35

## 36 INTRODUCTION

37 Many important cellular functions depend on formation of actin cytoskeleton networks at the correct time  
38 and location with specific architectures and dynamics (Campellone and Welch, 2010; Pollard and Cooper,  
39 2009). For example, filopodia are filamentous actin (F-actin)-rich finger-like protrusions that elongate  
40 from the lamellipodium, a dense, branched F-actin network kept short by capping protein (Pollard and  
41 Borisy, 2003) at the cell periphery. Filopodia are important for cell motility and environment sensing.  
42 Filopodial actin filaments are assembled by actin elongation factors such as formins and  
43 Enabled/vasodilator-stimulated phosphoprotein (Ena/VASP) (Mattila and Lappalainen, 2008). During  
44 filopodia initiation Ena/VASP localizes to the edge of the lamellipodium where it competes with capping  
45 protein for barbed ends (Applewhite et al., 2007; Barzik et al., 2005; Bear et al., 2002; Bear and Gertler,  
46 2009; Svitkina et al., 2003; Winkelman et al., 2014), and then facilitates generation of long, straight  
47 filaments by remaining processively associated with barbed ends and increasing their elongation rate 2-  
48 to 7-fold (Breitsprecher et al., 2011, 2008; Brühmann et al., 2017; Hansen and Mullins, 2010; Pasic et al.,  
49 2008; Winkelman et al., 2014). The 10-30 filaments in filopodia are bundled primarily by fascin, a  
50 globular crosslinking protein containing  $\beta$ -trefoil domains (Jansen et al., 2011; Vignjevic et al., 2006).  
51 Fascin bundles are composed of parallel filaments with narrow spacing, between 8-10 nm (Cant et al.,  
52 1994; Edwards and Bryan, 1995; Jansen et al., 2011; Yang et al., 2013). Ena/VASP continues to localize  
53 to the tips of mature filopodia, where fascin-bundled filaments ultimately are the same length (Faix and  
54 Rottner, 2006; Gupton and Gertler, 2007), presumably assuring uniform thickness of filopodia required  
55 for protrusive force (Svitkina et al., 2003; Winkelman et al., 2014).

56 Ena/VASP is a multidomain homotetramer with homologs in all metazoan cells (Sebé-Pedrós et  
57 al., 2013). A few Ena/VASP homologs have been biochemically characterized including human VASP  
58 (Bachmann et al., 1999; Breitsprecher et al., 2008; Chereau and Dominguez, 2006; Hansen and Mullins,  
59 2010; Pasic et al., 2008), *Drosophila* Enabled (Winkelman et al., 2014), and *Dictyostelium* VASP  
60 (Breitsprecher et al., 2008). Ena/VASP proteins contain two conserved Ena/VASP homology domains,  
61 EVH1 and EVH2 (Figure 1A). The N-terminus EVH1 domain is important for cellular localization and  
62 binds to proteins with FPPPP (FP4) repeats, such as lamellipodin, zyxin, and formin (Ball et al., 2001;  
63 Bilancia et al., 2014). The C-terminus EVH2 domain consists of three smaller subdomains: G-actin  
64 binding domain (GAB) (Bachmann et al., 1999; Ferron et al., 2007), F-actin binding domain (FAB)  
65 (Dominguez and Holmes, 2011), and a C-terminal coiled-coil tetramerization domain (Bachmann et al.,

66 1999; Kuhnel et al., 2004). Between the EVH1 and EVH2 domains there is a poly-proline rich region that  
67 binds profilin as well as SH3 domains (Ferron et al., 2007; Hansen and Mullins, 2010).

68 In addition to the leading edge and tips of filopodia, Ena/VASP proteins also localize to focal  
69 adhesions and stress fibers (Brindle et al., 1996; Reinhard et al., 1992), which are composed of filaments  
70 crosslinked by CH domain superfamily crosslinkers, fimbrin/plastin and  $\alpha$ -actinin. Fimbrin also localizes  
71 to the lamellipodia and base of filopodia, and it bundles both parallel and antiparallel filaments with  
72 narrow spacing (10-12 nm), similar to fascin (Hanein et al., 1998). In comparison,  $\alpha$ -actinin bundles  
73 filaments of mixed polarity with much wider spacing (30-36 nm) (Sjöblom et al., 2008).

74 We previously discovered that for F-actin bundles made by human fascin, *Drosophila* Enabled  
75 (Ena) remains processively associated with trailing barbed ends (shorter filaments) ~3-fold longer than  
76 leading barbed ends (longest filament) (Figure 1B) (Winkelman et al., 2014). We hypothesized that Ena's  
77 increased processivity on trailing barbed ends contributes to robust filopodia formation through promoting  
78 growth of these shorter filaments by prolonged protection against capping protein and increased  
79 elongation rate. Trailing barbed ends are thereby allowed to catch up to leading barbed ends ensuring  
80 mature filopodia with bundled filaments of uniform length. However, the underlying molecular  
81 mechanisms that facilitate Ena's enhanced processivity on bundled filaments remain unclear.

82 We used a combination of in vitro reconstitution with single-molecule multi-color total internal  
83 reflection fluorescence microscopy (TIRFM), kinetic modeling, and analysis of *Drosophila* culture cells  
84 to characterize the dynamics and function of processive elongation of single and bundled filaments by  
85 multiple Ena/VASP homologs including Ena, human VASP, and *C. elegans* UNC-34. We discovered that  
86 enhanced processivity on trailing barbed ends is specific to fascin bundles and is positively correlated with  
87 the number of filaments in a bundle as well as the number of Ena monomers, or 'arms', available to bind  
88 nearby filaments. We also observed that Ena tetramers are more efficient at forming filopodia in  
89 *Drosophila* culture cells compared to Ena dimers and trimers. Together, our experiments and simulations  
90 inform our mechanistic understanding of Ena/VASP on single and bundled filaments and demonstrate that  
91 avidity of multiple filaments within fascin bundles and multiple Ena arms leads to increased processivity  
92 of tetrameric Ena on trailing barbed ends.

93

## 94 **RESULTS**

95 **Ena is more processive on trailing barbed ends of both human and fly fascin (Singed) bundles.** To  
96 understand what features are important for *Drosophila* Ena's enhanced processivity on trailing barbed

97 ends within human fascin bundles (Figure 1B) (Winkelman et al., 2014), we first tested if a different fascin  
98 homolog also facilitates enhanced residence times. We used two-color TIRFM to directly visualize the  
99 assembly of 1.5  $\mu$ M Mg-ATP-actin monomers (15% Oregon green-labeled) with 15 pM fluorescently  
100 labeled SNAP(549)-Ena $\Delta$ L (referred to as Ena) (Figure 1A) and human fascin or fly fascin, Singed.  
101 TIRFM allows direct visualization of individual Ena molecule dynamics on single and bundled actin  
102 filament barbed ends. Ena processive run lengths were measured for leading and single filament barbed  
103 ends (collectively referred to as leading) as well as trailing barbed ends (Figure 1C-D, Movie 1). Kaplan  
104 Meier survival curves were calculated from individual Ena processive runs (Figure 1E-F), revealing that  
105 Ena remains associated with trailing barbed ends ( $\tau_{\text{fascin}} = 23.7$  s,  $\tau_{\text{Singed}} = 28.1$  s)  $\sim$ 3-fold longer than  
106 leading barbed ends ( $\tau_{\text{fascin}} = 8.4$  s,  $\tau_{\text{Singed}} = 10.1$  s) for both human fascin and fly Singed (Figure 1I, Table  
107 1), consistent with our previous findings (Winkelman et al., 2014). Therefore, enhancement of Ena's  
108 processive elongation on trailing barbed ends is not specific to a particular fascin homolog.

109

110 **Ena's residence time is not enhanced on trailing barbed ends of fimbrin and  $\alpha$ -actinin bundles.** To  
111 determine if diverse bundle architectures are similarly sufficient to enhance Ena's processivity on trailing  
112 barbed ends, we tested the effect of bundling proteins with distinct properties (fimbrin and  $\alpha$ -actinin, see  
113 introduction). First, we measured elongation rates of Ena-bound leading and trailing barbed ends of  
114 filaments bundled by human fascin, fly fascin Singed,  $\alpha$ -actinin, or fimbrin. Two-color TIRFM  
115 visualization of control and Ena-bound barbed ends revealed a similar fold increase in Ena-mediated actin  
116 elongation for leading ( $\sim$ 2.2- to 3-fold) and trailing ( $\sim$ 2- to 2.5-fold) barbed ends with all four bundling  
117 proteins (Figure 1K, Tables 2-3). Therefore, Ena's barbed end elongation enhancement is bundling protein  
118 independent.

119 Conversely, Ena's enhanced processivity on trailing barbed ends is specific to fascin bundles. The  
120 average processive run length on leading barbed ends with all four bundling proteins is similar,  $\sim$ 10 sec  
121 (Figure 1I). However, there is no enhancement of Ena's average residence time on trailing barbed ends of  
122  $\alpha$ -actinin ( $\tau = 9.4$  s) or fimbrin ( $\tau = 8.7$  s) bundles (Figure 1G-I, Table 1). Therefore, F-actin bundling  
123 proteins are not universally sufficient to enhance Ena's processivity on trailing barbed ends. Although  
124 fascin exclusively forms parallel bundles,  $\alpha$ -actinin and fimbrin form bundles composed of filaments with  
125 mixed polarities. We therefore compared Ena's residence time on trailing barbed ends in parallel and  
126 antiparallel two-filament bundles. For both fimbrin and  $\alpha$ -actinin bundles, the average residence time for  
127 trailing parallel and antiparallel barbed ends is equivalent; thus, neither bundler enhances Ena's

128 processivity (Figure 1J, Table 4). Therefore, neither ‘fascin-like’ filament spacing (8-10 nm) nor polarity  
129 (parallel) of actin filaments within bundles is sufficient to facilitate increased processivity on trailing  
130 barbed ends. Given that Ena’s ~3-fold enhancement of processivity on trailing barbed ends is specific to  
131 fascin, different bundling proteins could regulate Ena’s specific activity for different F-actin networks.

132

133 **Ena’s processive run length increases with bundle size.** Filopodia are composed of ~10-30 actin  
134 filaments bundled by fascin (Faix and Rottner, 2006; Svitkina et al., 2003), suggesting an avidity  
135 mechanism where enhanced processivity depends on Ena simultaneously associating with a barbed end  
136 and sides of neighboring filaments. To test whether the number of filaments in a fascin bundle positively  
137 correlates with processive run length, we determined the dependence of Ena’s enhanced processivity on  
138 fascin bundle size (Figure 2A). Average run lengths on trailing barbed ends (Figure 1E-F) was thereby  
139 parsed into 2-filament bundles or 3- or more filament bundles for both human and fly fascin (Figure 2B-  
140 D, Table 1). Ena’s average residence time on trailing barbed ends of a 2-filament bundle ( $\tau_{\text{fascin}} = 16.8$  s,  
141  $\tau_{\text{Singed}} = 21.7$  s) is ~2-fold longer than on single filament barbed ends ( $\tau_{\text{fascin}} = 8.9$  s,  $\tau_{\text{Singed}} = 10.0$  s).  
142 Furthermore, there is an additional ~1.5-fold increase in processivity when Ena is bound to trailing barbed  
143 ends of 3- or more filament bundles ( $\tau_{\text{fascin}} = 26.0$  s,  $\tau_{\text{Singed}} = 32.2$  s) (Figure 2D). Therefore, consistent  
144 with an avidity effect, Ena’s processivity increases with the number of fascin-bundled filaments.

145

146 **Human VASP and worm UNC-34 also have enhanced processive properties on fascin bundles.** To  
147 determine whether enhanced processivity on fascin-bundled trailing filament barbed ends is conserved  
148 among Ena/VASP family members, we extended our analysis to human VASP and worm UNC-34 (Figure  
149 1A). Human VASP is a well-characterized Ena/VASP protein (Bachmann et al., 1999; Breitsprecher et  
150 al., 2008; Chereau and Dominguez, 2006; Hansen and Mullins, 2010; Pasic et al., 2008), whereas UNC-  
151 34 had not yet been biochemically characterized in vitro despite multiple in vivo studies (Fleming et al.,  
152 2010; Havrylenko et al., 2015; Sheffield et al., 2007).

153 For our initial characterization of the three homologs, we measured the affinity for barbed ends  
154 and effect on actin elongation for Ena, VASP and UNC-34. Initially, the effect of Ena/VASP homologs  
155 on actin elongation rates and their apparent affinity ( $K_d$ , app) for barbed ends was determined by single-  
156 color TIRFM visualization of spontaneous assembly of 1.5  $\mu\text{M}$  Mg-ATP-actin (15% Oregon Green) over  
157 a range of concentrations for each unlabeled Ena/VASP homolog (Figure 2 – figure supplement 1A-F).  
158 All three Ena/VASP homologs increase actin elongation by a similar amount, ~1.6- to ~2.7-fold, at or near

159 saturating conditions, but have somewhat varying affinities for actin filament barbed ends ranging from  
160 3.2 nM (Ena) to 6.7 nM (UNC-34) to 12.2 nM (VASP) (Figure 2 – figure supplement 1F). Likewise, bulk  
161 seeded pyrene actin assembly assays also show that all three Ena/VASP homologs increase actin  
162 elongation rates by similar amounts, and fits of assembly rate over a range of Ena/VASP concentrations  
163 revealed apparent affinities for barbed ends ranging from 0.7 nM (Ena) to 10.2 nM (UNC-34) to 10.8 nM  
164 (VASP) (Figure 2 – figure supplement 1G-H). We then used two-color TIRFM visualizations of red-  
165 labeled Ena, VASP, and UNC-34 on fascin bundles to measure actin elongation rates of Ena/VASP-bound  
166 leading and trailing barbed ends (Figure 2 – figure supplement 1I, Movie 2). All three Ena/VASP  
167 homologs similarly increase actin elongation ~2- to 3-fold on both leading and trailing barbed ends (Figure  
168 2 – figure supplement 1J, Tables 3,5). Enhancement of actin elongation rates by Ena and VASP are similar  
169 to previously reported values (Brühmann et al., 2017; Hansen and Mullins, 2010; Winkelman et al., 2014)  
170 and the actin elongation properties of UNC-34 are in good agreement with the other homologs. Therefore,  
171 though Ena, VASP, and UNC-34 vary in their barbed end affinity, they all similarly increase the actin  
172 elongation rate of both leading and trailing barbed ends of fascin-bundled filaments.

173 To test if different Ena/VASP homologs have similarly enhanced processive properties on fascin  
174 bundles, two-color TIRFM visualization of 1.5  $\mu$ M Mg-ATP-actin (15% Oregon Green) was used to  
175 quantify the processive run lengths of fluorescently labeled VASP and UNC-34 on fascin bundles (Figure  
176 2E-G, Movie 2). The average residence time of both VASP (1.0 s) and UNC-34 (1.2 s) on single filament  
177 barbed ends is ~9-fold shorter than Ena (8.9 s), as expected from lower apparent affinities for barbed ends  
178 and previously reported values (Hansen and Mullins, 2010). Yet, like Ena, both VASP and UNC-34 have  
179 ~2.5-fold longer processive run lengths on trailing barbed ends of 2-filament bundles ( $\tau_{\text{VASP}} = 2.6$  s,  $\tau_{\text{UNC-34}}$   
180  $= 2.9$  s), with an additional ~1.5-fold increase on trailing barbed ends of 3- or more filament bundles  
181 ( $\tau_{\text{VASP}} = 4.2$  s,  $\tau_{\text{UNC-34}} = 3.9$  s) (Figure 2E–G, Table 1). Therefore, enhanced processivity on fascin-bundled  
182 trailing barbed ends is conserved from worms to flies to humans, suggesting that enhanced processivity is  
183 important for Ena/VASP’s activity in cells.

184

185 **Enhanced elongation and processive run length increases with the number of Ena arms.** Wildtype  
186 Ena is a tetrameric protein (Kuhnel et al., 2004; Winkelman et al., 2014), with four arms that could  
187 facilitate simultaneous associations with a barbed end, neighboring actin filaments, and/or actin monomers  
188 for processive elongation. Since we observed that Ena’s average processive run length increases with  
189 number of fascin-bundled filaments (Figure 2), we investigated the importance of Ena’s oligomeric state



190 by measuring actin elongation and processive properties of dimeric and trimeric Ena. Dimer and trimer  
191 constructs were formed by replacing Ena's coiled-coil tetramerization domain with a GCN4 dimerization  
192 domain (Harbury et al., 1993) or a Foldon trimerization domain (Figure 3A) (Güthe et al., 2004;  
193 Papanikolopoulou et al., 2004); and the oligomeric state was verified by gel filtration and multi-angle light  
194 scattering (Figure 3 – figure supplement 1A-C). Two-color TIRFM was used to visualize 1.5  $\mu$ M Mg-  
195 ATP-actin (15% Alexa-488 labeled) with SNAP(549)-Ena $\Delta$ L $\Delta$ CC-GCN4 (referred to as Ena<sub>Dimer</sub>) or  
196 SNAP(549)-Ena $\Delta$ L $\Delta$ CC-Foldon (referred to as Ena<sub>Trimer</sub>) on fascin bundles. First, we measured actin  
197 elongation rates of Ena-bound leading and trailing barbed ends (Figure 3B, Tables 2,5). While all  
198 constructs increase actin's elongation rate on both leading and trailing filaments, the fold increase is  
199 positively correlated with the number of Ena arms. Ena<sub>Tetramer</sub> has the largest enhancement of actin  
200 elongation (2.56-fold leading, 2.1-fold trailing), followed by Ena<sub>Trimer</sub> (1.74-fold leading, 1.62-fold  
201 trailing), and then Ena<sub>Dimer</sub> (1.45-fold leading, 1.46-fold trailing).

202 Similar to actin elongation rates, average processive run length is also positively correlated with  
203 number of Ena arms (Figure 3C-E). Remarkably, although reduced  $\sim$ 10-fold compared to Ena<sub>Tetramer</sub>,  
204 Ena<sub>Dimer</sub> does remain processively associated with single filament ( $\tau = 1.2$  s), 2-filament trailing ( $\tau = 1.5$   
205 s), and 3- or more filament trailing ( $\tau = 2.5$  s) barbed ends (Figure 3C,E, Movie 3, Table 1). Ena<sub>Trimer</sub> has  
206 intermediate processivity on single filament ( $\tau = 5.3$  s), 2-filament trailing ( $\tau = 8.9$  s), and 3- or more  
207 filament trailing ( $\tau = 11.2$  s) barbed ends (Figure 3D,E, Table 1). For each construct, the fluorescence  
208 intensity was not correlated with run length (Figure 3 – figure supplement 1D-G), indicating that  
209 processive activity is not affected by Ena construct multimerization. Ena<sub>Trimer</sub>'s processive run lengths are  
210 similar to the residence time of Ena<sub>Tetramer</sub> on single filaments but are not comparably enhanced on trailing  
211 barbed ends (Figure 3E). Therefore, Ena<sub>Dimer</sub> is sufficient for processive elongation, Ena<sub>Trimer</sub> is necessary  
212 for longer processive runs on single filaments, but Ena<sub>Tetramer</sub> is necessary for the longest processive runs  
213 on trailing barbed ends of fascin bundles (Figure 3E). Interestingly, the avidity effect of multiple filaments  
214 in a fascin bundle is apparent even with fewer arms than the wildtype tetramer. The positive correlation  
215 between processive elongation and Ena arms is consistent with a recent study on chimeric human VASP  
216 with *Dictyostelium* GAB domains on single actin filaments (Brühmann et al., 2017).

217

218 **Tetrameric Ena is more efficient at forming filopodia in *Drosophila* culture cells.** Ena<sub>Tetramer</sub> is  
219 significantly better at processive actin filament assembly than either Ena<sub>Dimer</sub> or Ena<sub>Trimer</sub>, where Ena<sub>Tetramer</sub>  
220 increases the actin elongation rate  $\sim$ 2- to 2.5-fold and remains processively associated with trailing barbed

221 ends of fascin bundles for ~25 sec (Figure 3B,E). To determine whether WT Ena<sub>Tetramer</sub> is therefore  
222 necessary for proper function in cells, we evaluated the ability of Ena oligomerization constructs to  
223 facilitate filopodia in ML-DmD16-c3 *Drosophila* culture cells, derived from third instar larval wing discs  
224 (Figure 4). We knocked down endogenous Ena with dsRNAi against the 3'UTR and then expressed  
225 mCherry-Ena (referred to as mCherry-Ena<sub>Tetramer</sub>), mCherry-Ena $\Delta$ CC-GCN4 (referred to as mCherry-  
226 Ena<sub>Dimer</sub>) or mCherry-Ena $\Delta$ CC-Foldon (referred to as mCherry-Ena<sub>Trimer</sub>) constructs from a constitutive  
227 pIZ plasmid (Figure 4A-C). The activity of the different Ena constructs was determined by quantifying  
228 filopodia density, the number of filopodia per perimeter of the cell (Figure 4D). Compared to control cells  
229 ( $0.19 \pm 0.06$  filopodia/micron), RNAi treated cells without exogenous Ena have a 2.7-fold decrease in  
230 filopodia density ( $0.07 \pm 0.03$  filopodia/micron). Strikingly, mCherry-Ena<sub>Tetramer</sub> forms significantly more  
231 filopodia ( $0.24 \pm 0.05$  filopodia/micron) compared to mCherry-Ena<sub>Trimer</sub> ( $0.15 \pm 0.05$  filopodia/micron)  
232 and mCherry-Ena<sub>Dimer</sub> ( $0.15 \pm 0.04$  filopodia/micron). There was no correlation between filopodia density  
233 and GFP-actin fluorescence or mCherry fluorescence (Figure 4 – figure supplement 1). Therefore, Ena  
234 tetramers facilitate the production of significantly more filopodia than dimer and trimer constructs  
235 following knockdown of endogenous Ena.

236

237 **Kinetic model of Ena shows a direct correlation between processivity and both bundle size and Ena**  
238 **oligomerization.** We observed that Ena's processivity depends on the number of filaments in a fascin  
239 bundle (Figure 2D) and number of Ena arms (Figure 3E). Therefore, it is likely that the underlying  
240 molecular mechanism for Ena's increased processivity on trailing barbed ends depends on Ena's ability  
241 to simultaneously bind to an elongating barbed end and sides of filaments via its multiple arms (Figure  
242 1B). To investigate this avidity effect, we developed a kinetic model of Ena with varying number of  
243 arms,  $N$ , binding bundles composed of varying number of actin filaments,  $n$  (Figure 5, Figure 5 – figure  
244 supplement).

245 Our model considers binding and unbinding kinetics of all  $N$  Ena arms on various binding sites of  
246 individual actin filaments in a bundle, which together dictate the kinetics of the Ena “molecule” as a whole  
247 (Figure 5A). An Ena arm initially binds to the trailing barbed end with an on rate of  $k_{\text{on},1}^t$  and unbinds  
248 with an off rate of  $k_{\text{off},1}^t$  (Figure 5A1). The remaining Ena arms are available to bind and unbind to the  
249 side of the trailing filament with a rate  $k_{\text{on}}^t$  and  $k_{\text{off}}^t$  or to the side of other filaments in the bundle with a  
250 rate  $k_{\text{on}}^l$  and  $k_{\text{off}}^l$  (Figure 5A2-3). A Monte Carlo algorithm was used to integrate rates of binding and



251 unbinding of Ena arms over time as described in the materials and methods. The model parameter  $k_{\text{on},1}^t$  was  
252  $0.007 \text{ s}^{-1}$ , estimated using the TIRFM measured off rate of  $0.109 \text{ s}^{-1}$  for Ena, and an equilibrium constant  
253 of Ena for the barbed end of  $0.8 \text{ nM}$  (Winkelman et al., 2014). We therefore considered the local  
254 concentration of Ena near the barbed end as  $50 \text{ pM}$ . The other model parameters were optimized using  
255 TIRFM off rates for  $N \in (2,3,4)$  and  $n \in (1,2, \geq 3)$  (Figure 3E), as described in the materials and  
256 methods.

257 We used the model to characterize Ena's processive run length at the trailing barbed end.  
258 Increasing both the number of filaments in a bundle and the number of Ena arms increases Ena's  
259 processive run length, which strongly supports the avidity hypothesis. The modeling results are also in  
260 excellent agreement with the trends observed from our TIRFM data (Figure 5B). Using the model, we  
261 tested conditions over a range of both  $k_{\text{on}}^l$  and  $k_{\text{off}}^l$  to mimic  $\alpha$ -actinin and fimbrin bundles (Figure 1I),  
262 where Ena processivity is not enhanced on trailing barbed ends (Figure 5 – figure supplement 1B-F). The  
263 model shows a broad regime that results in the same average processive run length on both leading and  
264 trailing barbed ends (Figure 5C, dashed region). This indicates that differences between bundlers could  
265 be due to diverse association and dissociation rates caused by differences in how CH domain bundlers and  
266 fascin bind F-actin.

267 Finally, we used the model to estimate rates of Ena-mediated filament elongation. While at least  
268 one Ena arm associates with the barbed end, its other arms undergo binding and dissociation events. When  
269 free, an arm can bind G-actin from solution and transfer it to the barbed end. The elongation rate of the  
270 Ena bound filament should be proportional to the average time that individual arms are free. From the  
271 model, the average time that individual arms remain unbound while the Ena molecule is in the bound state,  
272  $\tau_{\text{free}}^{\text{arm}}$ , increases with  $N$ , and decreases with  $n$  (Figure 5D). This result is consistent with the TIRFM data  
273 for the fold increase of actin elongation rate due to Ena on the leading ( $n = 1$  in the model) and trailing  
274 barbed ends ( $n > 1$  in the model) (Figure 1K, 3B).

275

## 276 **DISCUSSION**

277 **Ena's processivity is enhanced specifically on fascin bundles.** Ena/VASP proteins are important  
278 processive actin elongation factors that are localized to diverse F-actin networks composed of filaments  
279 bundled by different crosslinking proteins, including fascin, fimbrin, and  $\alpha$ -actinin. Previously, we found  
280 that Ena takes  $\sim 3$ -fold longer processive runs on trailing barbed ends of fascin-bundled F-actin  
281 (Winkelman et al., 2014). Here we investigated the mechanism and conservation of Ena/VASP's

282 processivity at the barbed end of single filaments and filaments bundled by different crosslinking proteins,  
283 as well as the physiological relevance of Ena/VASP tetramerization.

284 We found that although fly Ena's processivity is enhanced ~3-fold on trailing barbed ends in fascin  
285 bundles, there is no processivity enhancement on trailing barbed ends of  $\alpha$ -actinin or fimbrin bundles  
286 (Figure 1I). Fimbrin and  $\alpha$ -actinin use two CH domains to bundle F-actin, whereas fascin uses  $\beta$ -trefoil  
287 domains. Though the exact mechanism for Ena's specificity for fascin bundles remains unclear, we  
288 suggest several hypotheses. First, fascin could hold the trailing filament in a specific register with respect  
289 to the leading filament, allowing for easier Ena/VASP binding. Second, fascin's strong cooperativity  
290 (Winkelman et al., 2016; Yamakita et al., 1996) could promote more rapid bundling, thereby promoting  
291 longer processive runs by keeping trailing barbed ends closer to sides of leading filaments. Third, it is also  
292 possible that Ena weakly associates with fascin, although no interaction has yet been detected. If Ena does  
293 associate with fascin, it would need to be carefully tuned because a strong interaction could pull Ena from  
294 the barbed end. Fourth, our kinetic model revealed a broad region of Ena binding kinetics to sides of  
295 bundled filaments ( $k_{on}^l$  and  $k_{off}^l$ ) that could explain Ena's lack of enhanced processivity on fimbrin and  
296  $\alpha$ -actinin bundles (Figure 5B). It is possible that these rates are affected by competition between Ena and  
297 the CH domain bundling proteins for similar binding sites on actin filaments. Further studies of how fascin  
298 forms F-actin networks differently than  $\alpha$ -actinin and fimbrin will be required to fully elucidate the  
299 underlying molecular mechanism. However, this important observation reveals for the first time that  
300 bundling proteins and the F-actin networks they form can differentially regulate the activity of processive  
301 actin assembly factors, thereby providing a mechanism to allow Ena/VASP proteins to facilitate the  
302 assembly of diverse bundled networks with different dynamics in cells. Understanding how different  
303 bundling proteins associate with and help form specific F-actin networks in cells will therefore be of  
304 critical importance.

305

306 **The mechanism of tetrameric Ena acting on fascin bundles for filopodia formation.** Given that Ena  
307 localizes to filopodia with fascin, lamellipodia with fimbrin and stress fibers with  $\alpha$ -actinin, sensitivity to  
308 diverse bundles could play an important role in regulating Ena activity in cells. Filopodia are unique  
309 amongst these networks with long, straight filaments that emerge from a network capped by capping  
310 proteins. Lamellipodia have short, branched filaments and stress fibers are contractile, bipolar networks.  
311 Thus, filopodia are the ideal network for enhanced Ena/VASP processivity facilitating elongation of  
312 longer filaments that requires stronger competition against capping protein to form a protrusive network.

313 The increased residence time on trailing barbed ends could play a critical role in a feedback mechanism  
314 between Ena and fascin in emerging filopodia (Winkelman et al., 2014). Ena/VASP-associated barbed  
315 ends elongate faster, assembling longer actin filaments that contain more fascin binding sites, which  
316 subsequently enhance Ena/VASP's processivity. Trailing barbed ends that have longer Ena processive  
317 runs can catch up to the leading barbed end, allowing all filaments to reach the same length and resulting  
318 in mature filopodia with uniform thickness and aligned barbed ends.

319

320 **Avidity promotes enhanced Ena processivity on fascin bundles.** We hypothesize that avidity between  
321 multiple actin filaments in a fascin bundle and multiple Ena arms promotes the formation of long filopodia  
322 filaments. We investigated the avidity effect by testing how the number of filaments in a fascin bundle  
323 and number of Ena arms affects Ena's processive run length. Our results strongly indicate that avidity  
324 plays a major role, as there is a ~2-fold increase in Ena's residence time on trailing barbed ends in 2-  
325 filament bundles and an additional ~1.5-fold increase on bundles with 3 or more filament compared to  
326 single filament barbed ends (Figure 2B-D). Similarly, the residence time of both VASP and UNC-34 is  
327 longer on trailing barbed ends and is correlated with number of actin filaments in a fascin bundle (Figure  
328 2E-G). Furthermore, the residence time of Ena<sub>Trimer</sub> and Ena<sub>Tetramer</sub> is ~4.5- and ~10-fold longer than  
329 Ena<sub>Dimer</sub> on fascin bundles with 3 or more filaments (Figure 3C-E). A recent study measuring processive  
330 elongation using chimeric human VASP with *Dictyostelium* FAB domains on single filaments (Brühmann  
331 et al., 2017) supports our conclusions that enhanced elongation and processive run length are positively  
332 correlated with the number of Ena arms. Observing this positive correlation under more 'physiological  
333 conditions', a construct using Ena's unmodified EVH2 domains and on fascin bundles, indicates that these  
334 properties are relevant for Ena's activity in cells and specifically for filopodia.

335 We further tested the avidity hypothesis by developing a kinetic model that incorporates Ena with  
336 differing number of arms binding to single or multiple filaments (Figure 5). Previous models have focused  
337 exclusively on modeling the kinetics of Ena/VASP-mediated barbed end elongation of single actin  
338 filaments (Breitsprecher et al., 2011; Brühmann et al., 2017; Hansen and Mullins, 2010). VASP-mediated  
339 single filament elongation rates were shown to increase linearly with the number of VASP arms in solution  
340 as predicted by the model (Breitsprecher et al., 2011). However, this model overlooks the binding kinetics  
341 of arms that are not associated with the barbed end. Hence, we developed a kinetic model that explicitly  
342 incorporates the binding and unbinding rates of each Ena arm on multiple filaments (Figure 5A). After an  
343 Ena arm binds to the barbed end ( $k_{on,1}^t$ ), the remaining arm(s) are free to bind to the side of the leading

344 filament(s) ( $k_{on}^l$ ) or the trailing filament ( $k_{on}^t$ ). We quantified the processive run length for various  
345 numbers of bundled filaments and Ena arms.

346 The model demonstrates that the avidity effect of Ena emerges from an effective increase in local  
347 concentration of F-actin that allows for more FAB binding sites and from multiple Ena arms with available  
348 FAB domains. The avidity effect results in longer residence times near the trailing barbed end.  
349 Importantly, if an arm dissociates from the trailing barbed end, Ena will continue to processively elongate  
350 the barbed end and not diffuse away given that other arms' FAB domains are associated with nearby actin  
351 filaments. Furthermore, our model that includes multiple arms binding to multiple actin filaments still has  
352 a linear correlation of elongation rates with number of Ena arms on single filaments (Figure 5D), as  
353 predicted by a previous model (Brühmann et al., 2017). The  $\tau_{free}^{arm}$  is linear with respect to increasing  
354 additional Ena arms on single filaments, but with increasing number of filaments there are diminishing  
355 returns by adding more Ena arms.  $\tau_{free}^{arm}$  peaks at a tetramer on larger bundles, which gives an additional  
356 argument of why a tetramer of Ena/VASP is evolutionarily preferred. We also observe that an Ena tetramer  
357 is more efficient at forming filopodia in *Drosophila* culture cells compared to dimer and trimer constructs  
358 (Figure 4). Since the tetramer has increased residence time on trailing barbed ends and increases actin's  
359 elongation rate above the dimer and trimer, this suggests that the tetramer is necessary for proper actin  
360 elongation rates and competition with capping protein to allow for the formation of the correct number of  
361 filopodia.

362

## 363 MATERIALS AND METHODS

364 **Total internal reflection fluorescence microscopy (TIRFM).** TIRFM images were collected at 250ms-  
365 1s intervals with a cellTIRF 4Line system (Olympus, Center Valley, PA) fitted to an Olympus IX-71  
366 microscope with through-the-objective TIRF illumination and an iXon EMCCD camera (Andor  
367 Technology, Belfast, UK). Mg-ATP-actin (15% Oregon Green or Alexa 488 labeled) was mixed with  
368 polymerization TIRF buffer [10 mM imidazole (pH 7.0), 50 mM KCl, 1 mM MgCl<sub>2</sub>, 1 mM EGTA, 50  
369 mM DTT, 0.2 mM ATP, 50 μM CaCl<sub>2</sub>, 15 mM glucose, 20 μg/mL catalase, 100 μg/mL glucose oxidase,  
370 and 0.5% (400 centipoise) methylcellulose] to induce F-actin assembly and any additional actin binding  
371 proteins. This mixture was transferred to a flow cell for imaging at room temperature. For two color  
372 TIRFM, we cyclically imaged labeled actin (1 frame, 488 nm excitation for 50ms) and SNAP(549)-  
373 Ena/VASP (1 frame, 561 nm excitation for 50ms) (Winkelman et al., 2014).

374

375 **D16 cell culture.** ML-DmD16-c3 (DGRC) cells were cultured in Schneider's Media with 10% Fetal  
376 Bovine Serum (Gibco, Waltham, MA), Anti-Anti (Gibco, Waltham, MA), and 10 µg/mL recombinant  
377 human insulin (Gibco, Waltham, MA), transfected with FugeneHD (Promega, Madison, WI), and imaged  
378 on extracellular matrix (ECM) coated glass-bottom dishes after 48–72 hr. ECM was harvested from ML-  
379 DmD17-c3 (DGRC, Bloomington, IN) (Currie and Rogers, 2011). All imaging was performed on a total  
380 internal reflection fluorescence (TIRF) system mounted on an inverted microscope (Ti-E, Nikon, Tokyo,  
381 Japan) using a 100X/1.49NA oil immersion TIRF objective driven by Nikon Elements software unless  
382 noted otherwise. Images were captured using an Orca-Flash 4.0 (Hamamatsu, Hamamatsu, Japan) and  
383 were processed for brightness and contrast using ImageJ (Schneider et al., 2012) analysis. We quantified  
384 >30 cells using CellGeo (Tsygankov et al., 2014). Filopodia were quantified with the criteria of >0.78 µm  
385 long and <0.91 µm wide.

386

387 **Plasmid Construction.** Enabled (Ena) constructs were prepared by removing the 6x-His tag from the C-  
388 terminus of previously described Ena constructs [MBP-SNAP-EnaΔL or MBP-EnaΔL] (Winkelman et  
389 al., 2014) and insertion into a MBP containing plasmid (pet21A) by standard restriction digest and infusion  
390 (Clontech, Mountain View, CA) following PCR amplification (iProof; Bio-Rad, Hercules, California).  
391 Ena<sub>Dimer</sub> and Ena<sub>Trimer</sub> constructs were prepared by removing the coiled-coil domain and adding a Foldon  
392 domain (Güthe et al., 2004; Papanikolopoulou et al., 2004) [MBP-SNAP-EnaΔLΔCC-Foldon] or GCN4  
393 domain (Harbury et al., 1993) [MBP-SNAP-EnaΔLΔCC-GCN4] from MBP-SNAP-EnaΔL. UNC-34 was  
394 cloned from worm cDNA and inserted into a pet21A vector with MBP-SNAP (New England Biolabs,  
395 Ipswich, MA) at XmaI/PacI sites, while also including a flexible linker (GGSGGS) in the forward primer  
396 sequence of SNAP constructs. Singed and VASP constructs were cloned from fly and human cDNA  
397 libraries, respectively. VASP was inserted into a MBP-SNAP and SNAP containing vector while Singed  
398 was inserted into a pGEX KT Ext plasmid containing GST with a Thrombin cleavage site at XbaI/XhoI  
399 sites. Plasmids for transfection of mCherry-EnaΔCC-GCN4 and mCherry-EnaΔCC-Foldon were cloned  
400 into a pIZ-mCherry-Ena (Bilancia et al., 2014) construct using infusion (Clontech, Mountain View, CA).  
401 The RNAi was designed using Primer3Plus (Untergasser et al., 2012) targeting the 3' UTR of *enabled*  
402 using forward primer 5' TAATACGACTCACTATAGGGAGACCACGTGATGGCATGTGCATAGGC  
403 3' and reverse primer 5' TAATACGACTCACTATAGGGAGACCACTGCTGAAGACTTGCTGGTTC  
404 3'. The 3'UTR was extracted from w1118 strain fly genome and the DNA region of interest was isolated  
405 by PCR amplification and placed in a bluescript SK vector. dsDNA was produced using PCR amplification

406 and dsRNA was produced from the resulting dsDNA using MEGAscript T7 Transcription kit (Invitrogen,  
407 Waltham, MA).

408

409 **Protein Expression and Purification.** Recombinant Ena/VASP proteins were purified by expressing in  
410 *Escherichia coli* strain BL21-Codon Plus (DE3)-RP (Agilent Technologies, Santa Clara, CA) with 0.25  
411 mM isopropyl  $\beta$ -D-1-thiogalactopyranoside for 16 h at 16 °C. Cells were lysed with an Emulsi-Flex-C3  
412 (Avestin, Ottawa, Canada) in extraction buffer [20 mM TRIS-HCl (pH 8.0), 200 mM NaCl, 10% glycerol,  
413 0.1 mM DTT] with 0.5  $\mu$ M PMSF and cOmplete, EDTA-free Protease Inhibitor Cocktail (Roche, Basel,  
414 Switzerland) and were clarified. The extract was incubated for 1 h at 4 °C with amylose resin (New  
415 England Biolabs, Ipswich, MA) and was washed with extraction buffer, then Ena/VASP was batch eluted  
416 with elution buffer [20 mM TRIS-HCl (pH 8.0), 200 mM NaCl, 10% glycerol, 0.1 mM DTT, 40 mM  
417 maltose] Ena/VASP was incubated overnight with and without 1  $\mu$ M TEV protease to cleave MBP and  
418 filtered on an Superdex 200 10/300 GL or Superose 6 Increase 10/300 GL column (GE Healthcare, Little  
419 Chalfont, UK) where they eluted as stable oligomers. Ena/VASP constructs were dialyzed against SNAP  
420 buffer [20 mM Hepes (pH 7.4), 200 mM KCl, 0.01% NaN<sub>3</sub>, and 10% Glycerol, and 0.1 mM DTT]. SEC-  
421 MALS was performed using DAWN HELEOS II and Optilab T-rEX (Wyatt Technology, Goleta, CA)  
422 with a Superdex 200 Increase 10/300 GL column and Akta FPLC (GE Healthcare, Little Chalfont, UK).  
423 SEC-MALS data was analyzed using Astra 6.0 (Wyatt Technology, Goleta, CA). SNAP-tagged proteins  
424 were labeled with BG-549 (New England Biolabs, Ipswich, MA) following the manufacturers' protocols.  
425 Concentrations of SNAP-tagged proteins and the degree of labeling were determined by densitometry of  
426 Coomassie stained bands on SDS/PAGE gels compared with standards. Ena/VASP was flash-frozen in  
427 liquid nitrogen and stored at -80 °C. N-terminal SNAP and MBP tags did not affect Ena/VASP's activity.  
428 Actin was purified from rabbit skeletal muscle acetone powder (Pel-Freez, Rogers, AR) or self-prepared  
429 chicken skeletal muscle acetone powder by a cycle of polymerization and depolymerization and gel  
430 filtration (Spudich and Watt, 1971). Gel-filtered actin was labeled with Oregon green (Kuhn and Pollard,  
431 2005) or Alexa 488. Human fascin, human  $\alpha$ -actinin IV, and *S. pombe* fimbrin were expressed in bacteria  
432 and purified as described (Li et al., 2016; Skau and Kovar, 2010; Vignjevic et al., 2003). Singed was  
433 purified in the same manner as previously reported for human fascin (Vignjevic et al., 2003).

434

435 **Glass Preparation.** Microscope slides and coverslips (#1.5; Fisher Scientific, Waltham, MA) were  
436 washed for 30 min with acetone and for 10 min with 95% ethanol, were sonicated for 2 h with Helmanex



437 III detergent (Hellma Analytics, Müllheim, Germany), incubated for 2 h with piranha solution (66.6%  
438 H<sub>2</sub>SO<sub>4</sub>, 33.3% H<sub>2</sub>O<sub>2</sub>), washed with deionized water, and dried. Glass then was incubated for 18 h with 1  
439 mg/mL mPeg-Silane (5,000 MW) in 95% ethanol, pH 2.0. Parallel strips of double-sided tape were placed  
440 on the coverslip to create multiple flow chambers (Zimmermann et al., 2016).

441

442 **Calculation of Residence Time and Elongation Rates.** To calculate Ena/VASP's residence time on  
443 barbed ends, SNAP(549)-Ena/VASP fluorescent spots associated with the barbed end were manually  
444 tracked using MTrackJ (Meijering et al., 2012) in ImageJ. Spots that did not move were not scored,  
445 because they were assumed to be adsorbed to the glass. Events that contained joined barbed ends with no  
446 clear leading or trailing barbed bend were not included in the average lifetime calculation. Residence times  
447 for single SNAP-549-Ena( $\Delta$ L) tetramers were determined by fitting a Kaplan-Meier (Kaplan and Meier,  
448 1958) survival curve with a single exponential equation,  $f(x) = x_0 * \exp^{-x/T1}$  to calculate the average  
449 lifetime. Kaplan Meier survival curves were used to account for processive runs that started before  
450 imaging began or ends after imaging terminated. Log rank statistical significance tests were done using  
451 Prism 7 (GraphPad Software, San Diego, CA). Barbed end elongation rates were calculated by measuring  
452 filament lengths over time with ImageJ software. Multiple filament lengths were plotted over time and the  
453 distribution was fit with a linear equation using KaleidaGraph 4.5 (Synergy Software, Reading, PA). To  
454 calculate the number of filaments in a bundle the TIRFM movie was used to follow the history of the  
455 filaments. This could most accurately differentiate between two-filament bundles and three or more  
456 filament bundles. Due to photobleaching of the filaments over time the actin fluorescence was not used to  
457 determine the number of filaments within the bundle.

458

459 **Fluorescence Spectroscopy.** Bulk actin assembly was measured from the fluorescence of pyrene-actin  
460 with a Safire2 or Infinite M200 Pro (Tecan Systems, Inc., Männedorf, Switzerland) fluorescent plate  
461 reader (Neidt et al., 2008). Briefly, unlabeled Mg-ATP-actin was preassembled into seeds for 1 hour by  
462 adding 50 mM KCl, 1 mM MgCl<sub>2</sub>, 1 mM EGTA, 10 mM imidazole, pH 7.0. The assay measures the  
463 elongation rate of actin by addition of 20% pyrene-labeled Mg-ATP-actin monomers and actin binding  
464 proteins to be assayed. Final protein concentrations are indicated in the figure legends.

465

466 **Development of kinetic model.** In order to test, mechanistically, the hypothesis that avidity of Ena  
467 binding multiple actin filaments with multiple arms determines an increase in time spent at the trailing

468 barbed end for fascin-crosslinked bundles, we developed a computational model. The model is based on  
469 a kinetic Monte Carlo algorithm that at each time step evaluates binding and unbinding probabilities of  
470 each Ena arm for each filament and, accordingly, changes the arm “state”. The kinetic Monte Carlo  
471 scheme is chosen because it can, in principle, give the exact evolution of the system, in terms of bound  
472 and unbound states of each Ena arm over time, thus providing a strong approximation of the sequence of  
473 events given individual Ena arm’s binding and unbinding rates, with respect to individual filaments. The  
474 kinetic model used in this work consisted of the following elementary reactions:

- 475 1. Initial binding of an arm of Ena to the barbed end of the trailing filament with a rate of  $k_{\text{on},1}^t$ .
- 476 2. At every subsequent step, binding and unbinding of:
  - 477 a. an arm of Ena to the barbed end of the trailing filament, with rates  $k_{\text{on},1}^t$  and  $k_{\text{off},1}^t$
  - 478 b. up to two other arms of Ena to the side of the trailing filament, with rates  $k_{\text{on}}^t$  and  $k_{\text{off}}^t$
  - 479 c. additional arms of Ena beyond three to the side of the trailing filament, with rates  $k_{\text{on},4+}^t$   
480 and  $k_{\text{off},4+}^t$
  - 481 d. other arms of Ena to the sides of other filaments in the bundle, with rates  $k_{\text{on}}^l$  and  $k_{\text{off}}^l$

482 In summary, once any arm is bound to the barbed end of the trailing filament, the Ena “molecule” is  
483 considered to be in the bound state. The Ena molecule unbinds only when none of its arms are bound to  
484 any of the filaments in the bundle. Thus, after initiation of the bound state for an Ena molecule, the arm  
485 bound to the barbed end can unbind and bind multiple times before the molecule unbinds.

486 The model was made efficient by only simulating events involving binding and unbinding of the Ena  
487 molecule to the barbed end of a trailing filament. Further, we did not intend to calculate the binding rate  
488 of the Ena molecule using the model, and instead optimized the model parameters based on TIRFM data  
489 (see below) for calculating the unbinding rates of Ena molecules, and predicting the kinetics of individual  
490 Ena arms while the molecule was bound. This gave rise to the following possible scenarios while the Ena  
491 molecule is in the bound state.

- 492 1. Only one arm is bound to either
  - 493 a. the barbed end
  - 494 b. the side of the trailing filament
  - 495 c. the side of another filament in the bundle
- 496 2. Two or more arms are bound
  - 497 a. one to the barbed end, others to the side of the same filament
  - 498 b. one to the barbed end, others to the side of another filament

- 499 c. one to the barbed end, others to the sides of the same and other filament(s)
- 500 d. some to the side of the same filament and the remaining to the side of another filament
- 501 e. all to the side of the same filament
- 502 f. all to the side of another filament

503

504 **Model parameters.** Since Ena is a homotetramer, all arms in this work are structurally identical to each  
505 other. Hence, not all of the eight kinetic rate constants  $k_{\text{on},1}^t$ ,  $k_{\text{off},1}^t$ ,  $k_{\text{on}}^t$ ,  $k_{\text{off}}^t$ ,  $k_{\text{on},4+}^t$ ,  $k_{\text{off},4+}^t$ ,  $k_{\text{on}}^l$  and  $k_{\text{off}}^l$   
506 in the model (Figure 5A) are independent. We set  $k_{\text{on},1}^t = 0.007$ , estimated using the TIRFM measured  
507 off rate of  $0.109 \text{ s}^{-1}$  for Ena, and an equilibrium constant of Ena for the barbed end of  $0.8 \text{ nM}$  (Winkelman  
508 et al., 2014). The model assumes that binding rates of the rest of the arms to sides of filaments are identical  
509 ( $k_{\text{on}}^t = k_{\text{on},4+}^t = k_{\text{on}}^l$ ), consistent with the idea that avidity results from binding and unbinding of multiple  
510 Ena arms to multiple filaments, rather than from different kinetics of individual arms. The corresponding  
511 unbinding rates were, however, assumed to be different owing to the following reasons. An arm bound to  
512 the barbed end interacts with the barbed end of the filament through its GAB domain and potentially its  
513 FAB domain, while an arm bound to the side of a filament interacts only through its FAB domain. Thus,  
514  $k_{\text{off},1}^t$  is considered an independent parameter. The number of FAB domain binding sites available on the  
515 trailing filament can be assumed to be less than those on leading filaments since it is the shortest filament  
516 in the bundle. Thus,  $k_{\text{off}}^t$  and  $k_{\text{off}}^l$  are a priori considered to be distinct parameters. Our TIRFM data (Figure  
517 3B) suggests that the fold increase in processive run length between a trimer and a tetramer binding to a  
518 single filament is smaller than the fold increase between a dimer and a trimer. Thus, the fourth arm binding  
519 to the same filament is assumed to have different unbinding kinetics represented using the rates  $k_{\text{off},4+}^t$ .  
520 This translates to having an upper limit on the number of arms that can simultaneously bind to a given  
521 filament.

522

523 **Optimization procedure for parameter estimation.** With the above assumptions, the number of  
524 undetermined parameters to be estimated reduces to five:  $k_{\text{on},1}^t$ ,  $k_{\text{on}}^t$ ,  $k_{\text{off}}^t$ ,  $k_{\text{off},4+}^t$  and  $k_{\text{off}}^l$ . These  
525 parameters were estimated using all 9 data points for the processive run length data in Figure 3B using the  
526 Levenberg-Marquardt algorithm implemented in the MATLAB® function “fsolve”. Let  $\tau(n, N)$  represent  
527 the processive run length of Ena with  $N$  arms on the trailing barbed end of a bundle consisting of  $n$  actin  
528 filaments. The rate ratio vector  $y$  is defined as

$$y = \begin{bmatrix} \tau(1,4)/\tau(1,2) & \tau(1,3)/\tau(1,2) & \tau(2,4)/\tau(1,4) & \tau(2,3)/\tau(1,3) & \tau(2,2) \\ & / \tau(1,2) & \tau(4,4)/\tau(1,4) & \tau(4,3)/\tau(1,3) & \tau(4,2)/\tau(1,2) \end{bmatrix} \quad (1)$$

529

530 the error was then defined as

$$\text{error} = \left[ \frac{y(\text{model}) - y(\text{TIRFM})}{y(\text{TIRFM})} \right]^2, \quad (2)$$

531 and minimized iteratively using the five undetermined parameters. For each iteration, the kinetic model  
532 was solved for each pair of  $N \in (2,3,4)$  and  $n \in (1,2,4)$  and the corresponding average processive run  
533 length (defined below) was calculated. The TIRFM data for  $n \geq 3$  in Figure 3E, corresponding to three  
534 or more filaments in the bundle, was considered to be equivalent to  $n = 4$  in the model, consistent with  
535 our observation that most bundles in the TIRF data fell between 3 and 5 filaments for an average ‘large’  
536 bundle.

537 For computational efficiency, we adopted a two-step strategy to obtain the optimum set of  
538 parameters. In the first step, we performed error minimization using 50 distinct initial guesses for the  
539 parameters and chose six optimized parameter sets with the lowest errors. In the second step, we performed  
540 error minimization using 100 sets of initial guesses, each perturbed within  $\pm 10\%$  of the average of these  
541 six sets from the first step. The parameter set with the least error was chosen as the final set (Table 6). A  
542 comparison of the rate ratio vectors from the model with corresponding data from TIRFM is shown in  
543 Table 7. The optimized parameter set was found to predict rate ratios in good agreement with the  
544 corresponding ratios from TIRFM data (Figure 3E).

545

546 **Algorithm.** Using the values of reaction rates provided in Table 6, the system evolved using a Monte  
547 Carlo algorithm with a constant time-step implemented in MATLAB®. The states of the arm binding the  
548 barbed end and the other arms binding sides of filaments was stored along corresponding columns in a  
549 *state* array, with an entry of 0 representing an unbound state and 1 representing a bound state. Each row  
550 in the array corresponded to a simulation step. The identity of the filament in the bundle that each Ena  
551 arm bound to was stored in a separate *filamentid* array, with filament identities ranging from 1 to  $n$ .

552 The simulation was initialized with all arms of Ena in the unbound state. At each timestep  $t + dt$ , a  
553 reaction move (either binding or unbinding) and the corresponding rate constants were selected depending  
554 on the previous state of the system at timestep  $t$  (Figure 5 – figure supplement 1A). For example, if the  
555 barbed end was bound at timestep  $t$ , the unbinding reaction with the rate constant of  $k_{\text{off},1}^t$  was selected at

556 timestep  $t + dt$ .  $N$  random numbers were generated, one corresponding to each arm, and compared with  
557 the rate constant of the selected reaction move. The move was accepted if the random number was less  
558 than the corresponding rate constant times  $dt$ , and the entries *state* and *filamentid* arrays were updated  
559 accordingly.

560

561 **Model verification and predictions.** The quantities in the model with units of timesteps were converted  
562 to real time in seconds by multiplying with a single factor of  $5.4374 \times 10^{-3}$  that accounted for the  
563 “timescale” and was chosen to exactly match the processive run length for a dimer on a single filament  
564 between the model (defined below) and the TIRFM data (leftmost red bar in Figure 3E). For computational  
565 efficiency, we used  $dt = 0.1$  s.

566 Assuming that any difference in fascin, alpha-actinin and fimbrin bundles due to spacing between  
567 filaments or different interactions should be reflected in the binding and unbinding kinetics, we  
568 systematically varied binding/unbinding rates  $k_{\text{on}}^l$  and  $k_{\text{off}}^l$  from 0.002 to 0.026  $\text{s}^{-1}$ , keeping other model  
569 parameters fixed (Figure 5 – figure supplement 1B-F). For a single filament, the processive run length of  
570 an Ena tetramer is independent from  $k_{\text{on}}^l$  and  $k_{\text{off}}^l$  as expected (Figure 5 – figure supplement 1B). With  
571 more than one filament, the processive run length increases with  $k_{\text{on}}^l$ , for increasing values of  $k_{\text{off}}^l$  below  
572  $\sim 0.010 \text{ s}^{-1}$  (Figure 5 – figure supplement 1C) or below  $\sim 0.026 \text{ s}^{-1}$  (Figure 5 – figure supplement 1D). We  
573 also systematically changed  $k_{\text{on}}^l$  and  $k_{\text{off}}^l$  using dimers and trimers on 3-filament bundles. Similar to the  
574 Ena tetramer, the Ena trimer and dimer showed processive run lengths that increased with  $k_{\text{on}}^l$  for values of  
575  $k_{\text{off}}^l$  below  $\sim 0.014 \text{ s}^{-1}$  (Figure 5 – figure supplement 1E-F). In the tested range of values for  $k_{\text{on}}^l$  and  $k_{\text{off}}^l$ ,  
576 the maximum run time with dimers is 3 s (Figure 5 – figure supplement 1E) and trimers is 20 s (Figure 5  
577 – figure supplement 1F). Our results show that the processive run length is determined by an interplay  
578 between the numbers of arms and filaments, and cross-linker effects on binding rates to sides of leading  
579 filaments.

580

581 **Defining processive run length ( $\tau$ ) and free arm time ( $\tau_{\text{free}}^{\text{arm}}$ ).**

582 Processive run length ( $\tau$ ). The Ena molecule binding was considered the beginning of a processive run  
583 event ( $\tau_{\text{start}}$ , Figure 5 – figure supplement 1A) and unbinding of the Ena molecule ( $\tau_{\text{end}}$ , marked in Figure  
584 5 – figure supplement 1A) denoted the end of a processive run event. The processive run length  $\tau$  was  
585 calculated by averaging the difference ( $\tau_{\text{start}} - \tau_{\text{end}}$ ) across all processive run events observed across 56

586 independent simulation runs, each consisting of a total of  $2 \times 10^6$  timesteps (equivalent to  $\sim 10000$   
587 seconds).

588 For the final data in Figure 5B, the total number of processive run events used for averaging varied  
589 depending on the number of Ena arms and number of filaments in the bundle. Based on the range in our  
590 TIRFM data (Figure 3E), the number of events were in the range of  $\sim 1.6 \times 10^5$  for ( $N = 4, n = 4$ ) and  
591  $6.8 \times 10^5$  for ( $N = 2, n = 1$ ). The least number of events used in obtaining data in Figure 5,  $\sim 4.6 \times 10^3$ ,  
592 corresponded to ( $N = 6, n = 6$ ).

593 Free arm time ( $\tau_{\text{free}}^{\text{arm}}$ ). During each processive run event in the model, individual Ena arms bind to and  
594 unbind from filaments independently, but according to their specific rates. The average time between  
595 consecutive binding events of an average arm was calculated and denoted as  $\tau_{\text{free}}^{\text{arm}}$ . A free Ena arm is  
596 available to recruit G-actin from the solution and transfer it to the barbed end with an effective rate that  
597 should be independent of the number of filaments in the bundle. Further, since each arm is identical, the  
598 effective rate should also be independent of the identity of the arm. It should be noted that in the model  
599 Ena arms do not have an identity associated with them and are only used as proxies to obtain statistics  
600 related to occupied versus unoccupied states of the barbed end and the sides of filaments. A rapid exchange  
601 of an Ena arm bound to the barbed end with an arm bound to the side of a filament is possible but not  
602 explicitly accounted for in the model. Thus, though the kinetic model does not explicitly consider filament  
603 elongation,  $\tau_{\text{free}}^{\text{arm}}$  is assumed to be approximately proportional to the elongation rate through this implicit  
604 effective rate at the resolution of the model.



605 **FIGURES AND FIGURE LEGENDS**

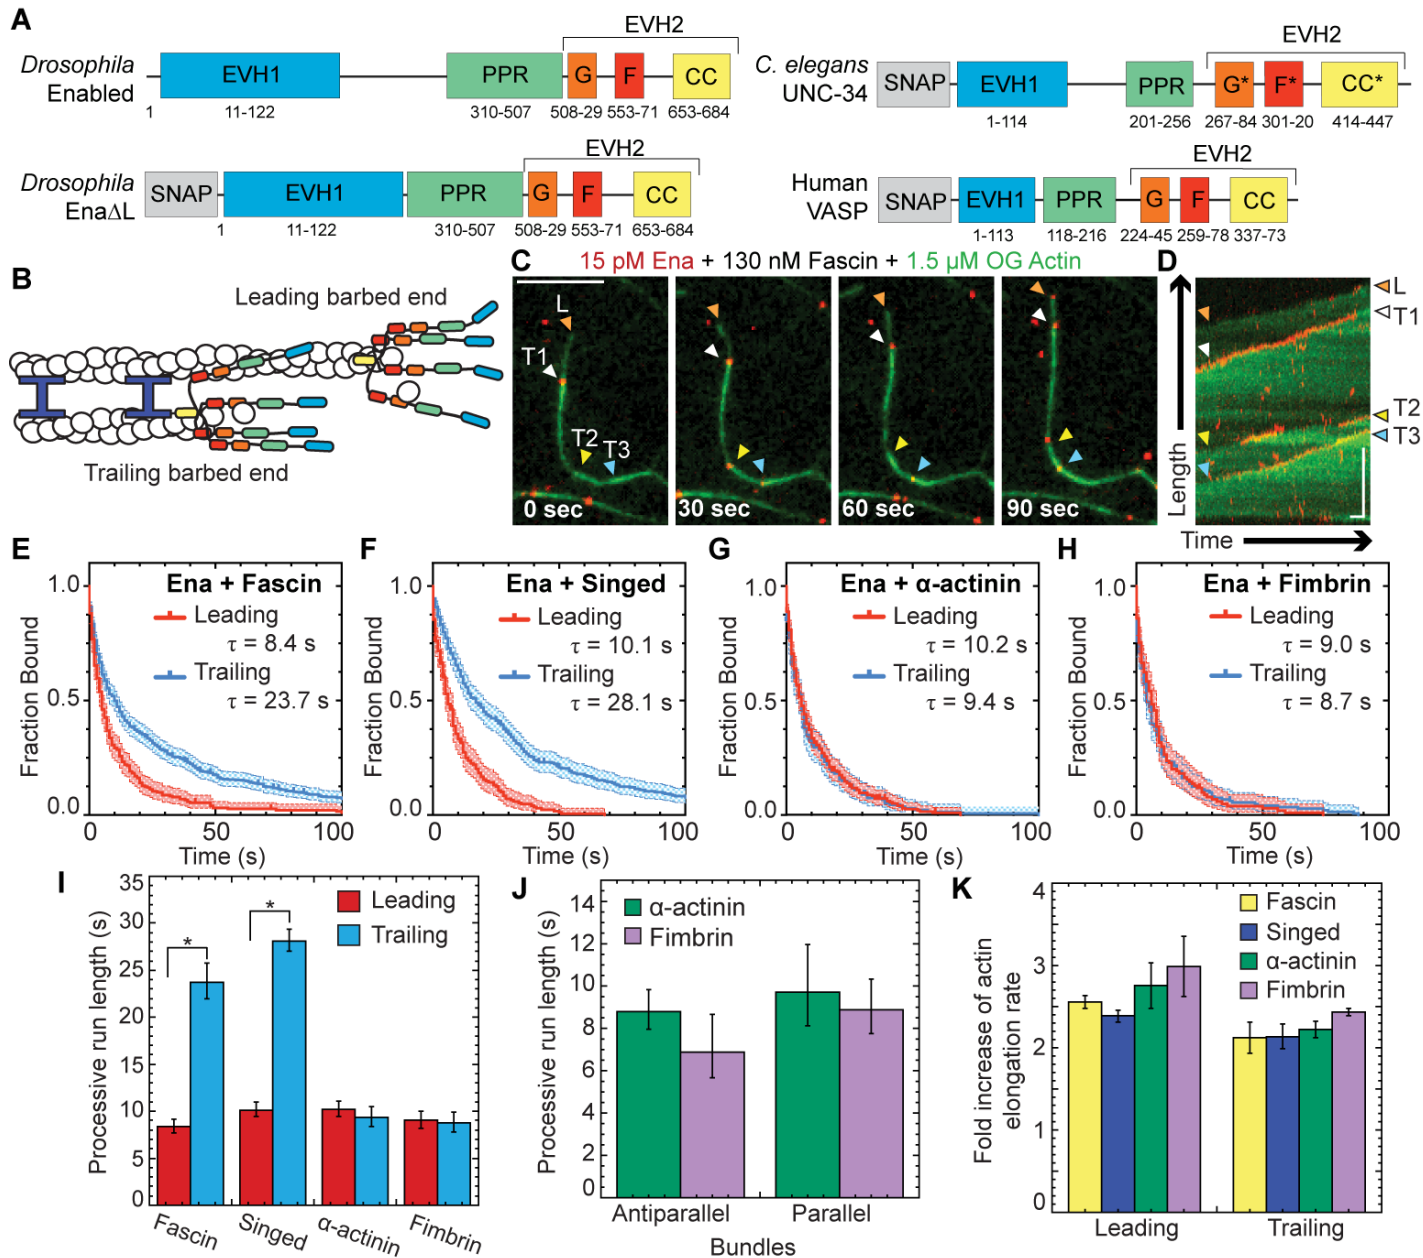

606 **Figure 1: Ena has enhanced processivity on F-actin bundles formed specifically by fascin.** (A)  
 607 Ena/VASP domain organization and constructs used for Ena, UNC-34, and VASP: Self-labeling tag  
 608 (SNAP), Ena/VASP homology domain 1 (EVH1), polyproline region (PPR), Ena/VASP homology  
 609 domain 2 (EVH2) includes G-actin binding domain (G), F-actin binding domain (F), coiled coil  
 610 region (CC). \*Putative domain. Two-color TIRFM visualization of 1.5 μM Mg-ATP-actin (15% Oregon green-  
 611 actin) with 15 pM SNAP(549)-EnaΔL and unlabeled 130 nM human fascin, 250 nM fly fascin Singed,  
 612 125 nM α-actinin, or 100 nM fimbrin. (B) Cartoon Ena/VASPs bound to leading and trailing barbed  
 613 ends in a fascin bundle. (C and D) Representative experiment of OG-actin with SNAP(549)-EnaΔL and fascin.  
 614 Arrows indicate leading (orange), 1<sup>st</sup> trailing (white), 2<sup>nd</sup> trailing (yellow) and 3<sup>rd</sup> trailing (blue) barbed

615 ends. (C) Merged time-lapse micrographs. Scale bar, 5  $\mu\text{m}$ . (D) Merged kymograph of filament length  
616 (scale bar, 5  $\mu\text{m}$ ) over time (time bar, 10 s). (E-H) Kaplan-Meier curves representing average processive  
617 run lengths ( $\tau$ ) for Ena with (E) fascin, (F) Singed, (G)  $\alpha$ -actinin, or (H) fimbrin on leading (red) and  
618 trailing (blue) barbed ends. Error bars, 95% CI.  $n \geq 127$ . (I) Average processive run lengths for leading  
619 (red) and trailing (blue) barbed ends shown in E-H for 2-filament bundles with fascin, Singed,  $\alpha$ -actinin,  
620 or fimbrin. P values ( $* < 0.0001$ ). Error bars, 95% CI. (J) Average processive run lengths for antiparallel  
621 and parallel 2-filament  $\alpha$ -actinin (green) or fimbrin (purple) bundles. Error bars, 95% CI.  $n \geq 64$ . (K) Fold  
622 increase of barbed end elongation rates of Ena on fascin (yellow), Singed (blue),  $\alpha$ -actinin (green), or  
623 fimbrin (purple) bundled filaments. Error bars, SEM.  $n \geq 5$  barbed ends from at least 2 movies.

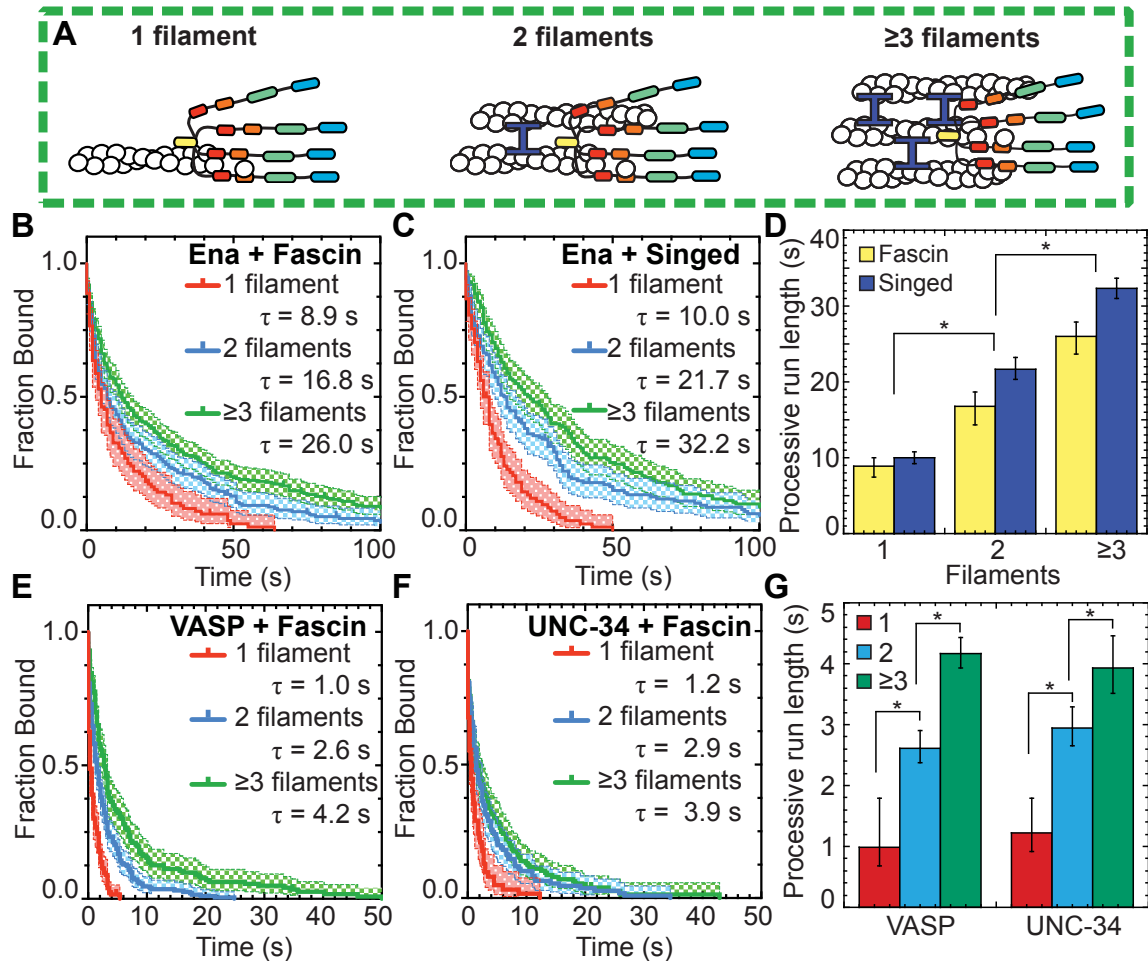

624

625

626

627

628

629

630

631

632

633

634

635

636

637

**Figure 2: Ena/VASP's processive run length increases with the number of filaments in a fascin bundle.** (A) Cartoons of Ena/VASP on a single filament and 2- and 3-filament fascin bundles. (B-G) Two-color TIRFM visualization of 1.5  $\mu$ M Mg-ATP-actin (15% Oregon green-actin) with fly SNAP(549)-Ena $\Delta$ L (red), human SNAP(549)-VASP or worm SNAP(549)-UNC-34 and unlabeled 130 nM human fascin or 250 nM Singed as indicated. (B and C) Kaplan-Meier curves representing average processive run lengths ( $\tau$ ) for 15 pM Ena with (B) fascin or (C) Singed on single filaments (red), or bundles with 2 (blue) and  $\geq 3$  (green) filaments. Error bars, 95% CI.  $n \geq 98$ . (D) Average processive run lengths for increasing number of filaments in fascin (yellow) or Singed (blue) bundles shown in B and C. Error bars, 95% CI.  $P$  values ( $* < 0.0001$ ). (E and F) Kaplan-Meier curves representing run lengths ( $\tau$ ) for (E) 25 pM VASP or (F) 18 pM UNC-34 with fascin on single filaments (red), or bundles with 2 (blue) and  $\geq 3$  (green) filaments. Error bars, 95% CI.  $n \geq 60$ . (G) VASP and UNC-34 average processive run lengths for increasing number of filaments in fascin bundles shown in E and F. Error bars, 95% CI.  $P$  values ( $* < 0.0001$ ).

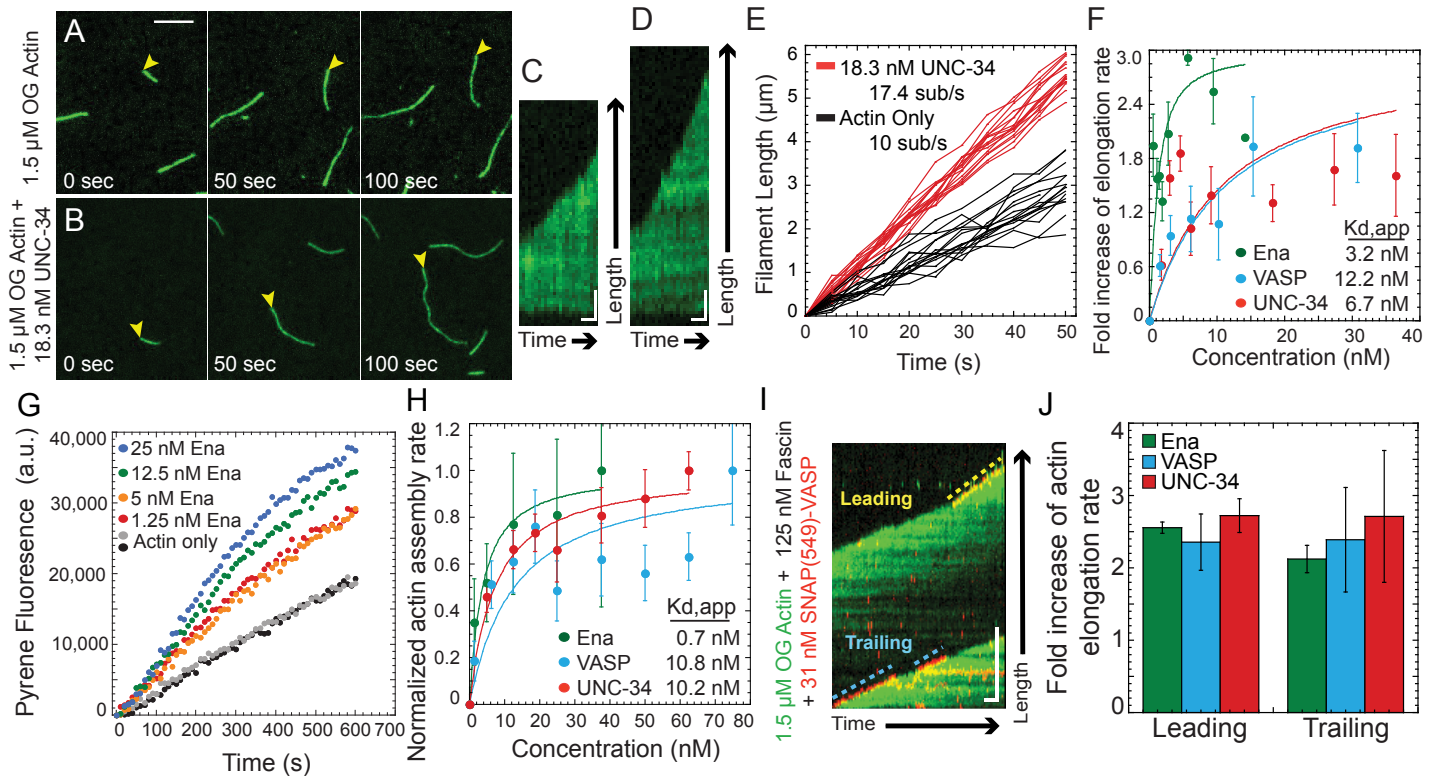

638

639

640

641

642

643

644

645

646

647

648

649

650

651

652

653

654

655

656

657

658

**Figure 2 – figure supplement 1. Ena/VASP homologs have generally conserved processive actin elongation properties.** (A-F) Single-color TIRFM of the spontaneous assembly of 1.5  $\mu\text{M}$  Mg-ATP-actin (15% Oregon Green) with worm UNC-34, fly Ena, and human VASP. (A and B) Time-lapse micrographs (scale bar, 5  $\mu\text{m}$ ), and (C and D) corresponding kymographs (scale bar, 1  $\mu\text{m}$ ; time bar, 5s) for (A and C) actin alone or with (B and D) 18 nM UNC-34. Yellow arrowheads indicate barbed ends. (E) Length of individual filaments over time for actin only (black) and UNC-34 (red). (F) Fold increase in elongation rate over increasing concentration of Ena (green), VASP (blue), and UNC-34 (red). Curve fits revealed the indicated apparent dissociation constants ( $K_{d,app}$ ) of Ena/VASP for the barbed end.  $n \geq 5$  filaments for at least 2 movies. (G and H) Seeded assembly: addition of 0.5  $\mu\text{M}$  Mg-ATP-actin monomers (20% pyrene-labeled) to the barbed end of 0.5  $\mu\text{M}$  preassembled actin filaments. (G) Time course of seeded assembly alone (black and gray) or with a range of Ena concentrations. (H) Dependence of the initial barbed end assembly rate on Ena/VASP concentration. Curve fits revealed the indicated apparent dissociation constants ( $K_{d,app}$ ) of Ena/VASP for the barbed end. Error, SEM.  $n \geq 3$ . (I and J) Two-color TIRFM visualization of 1.5  $\mu\text{M}$  Mg-ATP-actin (15% Oregon green-actin) with 25 pM SNAP(549)-VASP, 18 pM SNAP(549)-UNC-34 or 15 pM SNAP(549)-Ena, and unlabeled 130 nM human fascin. (I) Kymograph of leading and trailing barbed ends of a Fascin bundle with SNAP(549)-VASP (red) and OG actin (green). Dashed blue (trailing) and yellow (leading) lines indicate bound VASP. Scale bar, 5  $\mu\text{m}$ . Time bar, 10 s. (J) Average elongation rate of leading and trailing filament barbed ends on fascin bundles with actin alone, Ena, VASP, or UNC-34. Error bars, SEM.  $n \geq 5$  filaments for at least 2 movies. Elongation rate for Ena in (J) also shown in Figure 1K.

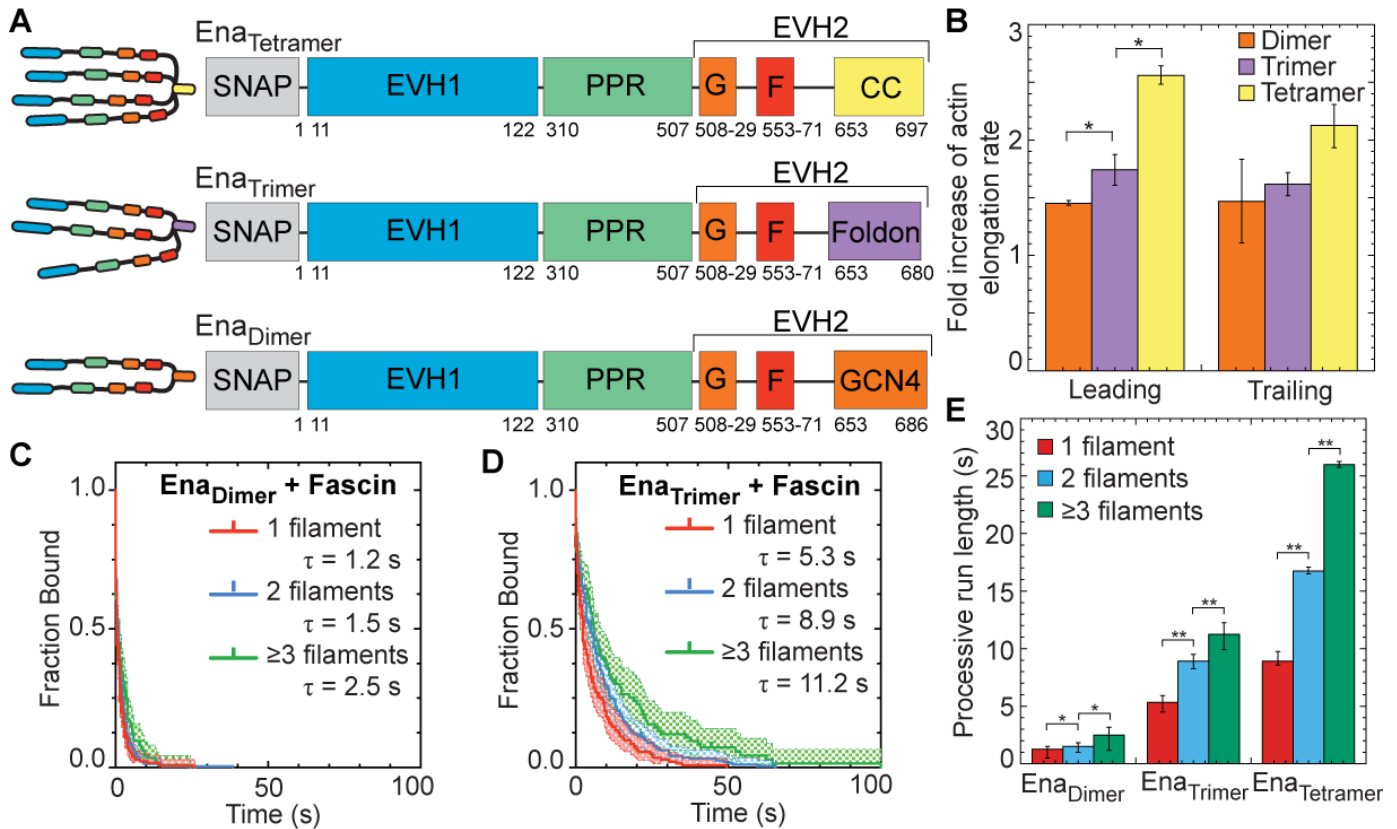

659 **Figure 3: Ena's processive run length increases with the number of Ena 'arms'.** (A) Cartoon and  
 660 domain organizations of Ena<sub>Tetramer</sub>, Ena<sub>Trimer</sub>, and Ena<sub>Dimer</sub>. (B-E) Two-color TIRFM visualization of 1.5  
 661  $\mu$ M Mg-ATP-actin (15% Alexa488-actin) with indicated SNAP(549)-Ena construct and 130 nM fascin.  
 662 (B) Fold increase of barbed end elongation rates of Ena<sub>Dimer</sub> (orange), Ena<sub>Trimer</sub> (purple), and Ena<sub>Tetramer</sub>  
 663 (yellow). Error bars, SEM.  $n \geq 5$  barbed ends from at least 2 movies. P values ( $* \leq 0.05$ ) (C and D) Kaplan-  
 664 Meier curves representing average processive run lengths ( $\tau$ ) for (C) 50 pM MBP-SNAP(549)-  
 665 Ena $\Delta$ LACC-GCN4 or (D) 70 pM MBP-SNAP(549)-Ena $\Delta$ LACC-Foldon with fascin on single filaments  
 666 (red), or bundles with 2 (blue) and  $\geq 3$  (green) filaments. Error bars, 95% CI.  $n \geq 93$ . (E) Average  
 667 processive run length for increasing number of Ena 'arms' on single filaments (red), or fascin bundles  
 668 with 2 (blue) and  $\geq 3$  (green) filaments shown in C and D. Error bars, 95% CI. P values ( $* < 0.05$ ,  
 669  $** < 0.0001$ ). Ena<sub>Tetramer</sub> data in (B) and (E) was also reported in Figure 1K and 2D respectively.



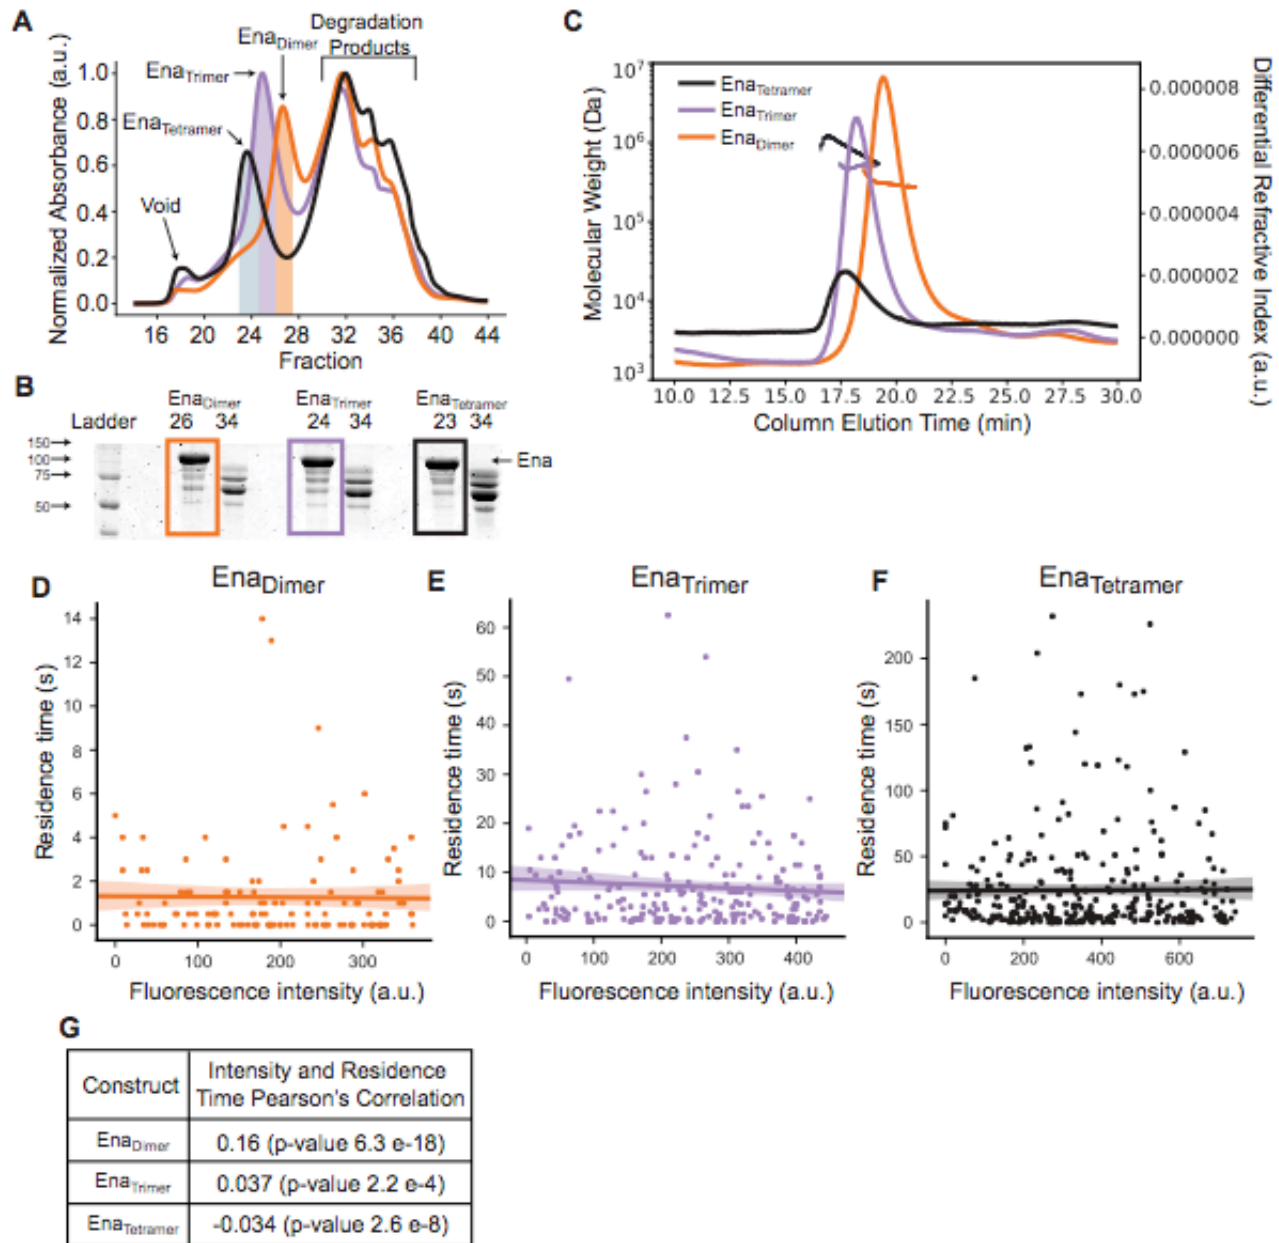

670

671 **Figure 3 – figure supplement 1. Ena constructs have the predicted oligomerization state.**(A) UV  
 672 traces for Ena<sub>Dimer</sub> (orange), Ena<sub>Trimer</sub> (purple), and Ena<sub>Tetramer</sub> (black) from size exclusion gel filtration  
 673 using a Sepharose 6 Increase column. Peaks are labeled and fractions collected are shaded. (B) The 12.5%  
 674 SDS-PAGE of fractions from A. Fractions showing each construct are boxed. (C) Size exclusion  
 675 chromatography followed by multi-angle light scattering (SEC-MALS) was used to determine the relative  
 676 size of Ena<sub>Dimer</sub> (orange), Ena<sub>Trimer</sub> (purple), and Ena<sub>Tetramer</sub> (black). (D) Values for the Pearson's correlation  
 677 of the Ena construct fluorescence intensity and its residence time for all movies analyzed. There is no  
 678 correlation between an Ena construct's intensity and its bound lifetime. Dependence of (E) Ena<sub>Dimer</sub>, (F)  
 679 Ena<sub>Trimer</sub>, or (G) Ena<sub>Tetramer</sub> processive run length on its respective fluorescence intensity for an individual  
 680 movie. Linear correlation fit shown with 95% CI shaded.



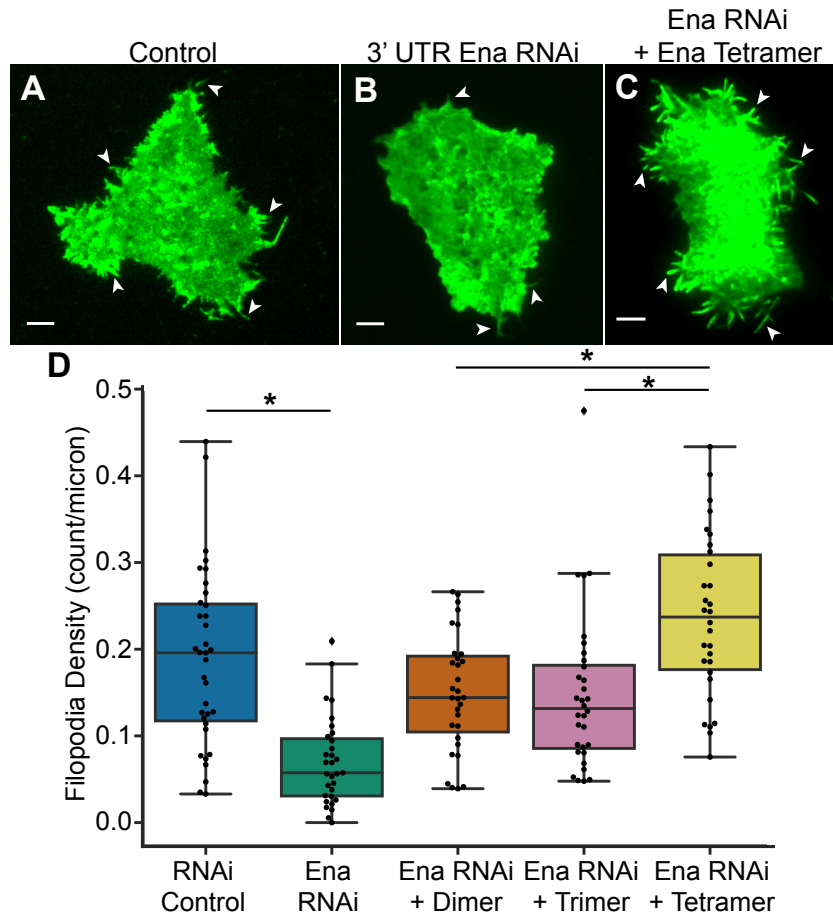

681

682 **Figure 4: Tetrameric Ena is necessary for proper filopodia density.** (A-C) Representative fluorescent  
683 micrographs of D16 cells with GFP-actin for (A) Control treatment, (B) Ena 3' UTR RNAi, and (C) RNAi  
684 with transfection of mCherry-Ena<sub>Tetramer</sub>. White arrows indicate representative filopodia. (D) Boxplot of  
685 filopodia density, number of filopodia per micron of cell perimeter, for control cells, Ena 3'UTR RNAi,  
686 and RNAi transfected with mCherry-Ena $\Delta$ CC-GCN4 (Ena<sub>Dimer</sub>), mCherry-Ena $\Delta$ CC-Foldon (Ena<sub>Trimer</sub>),  
687 and mCherry-Ena<sub>Tetramer</sub>. n = 3 with at least 10 cells for each experiment. P values (\*<0.0005).

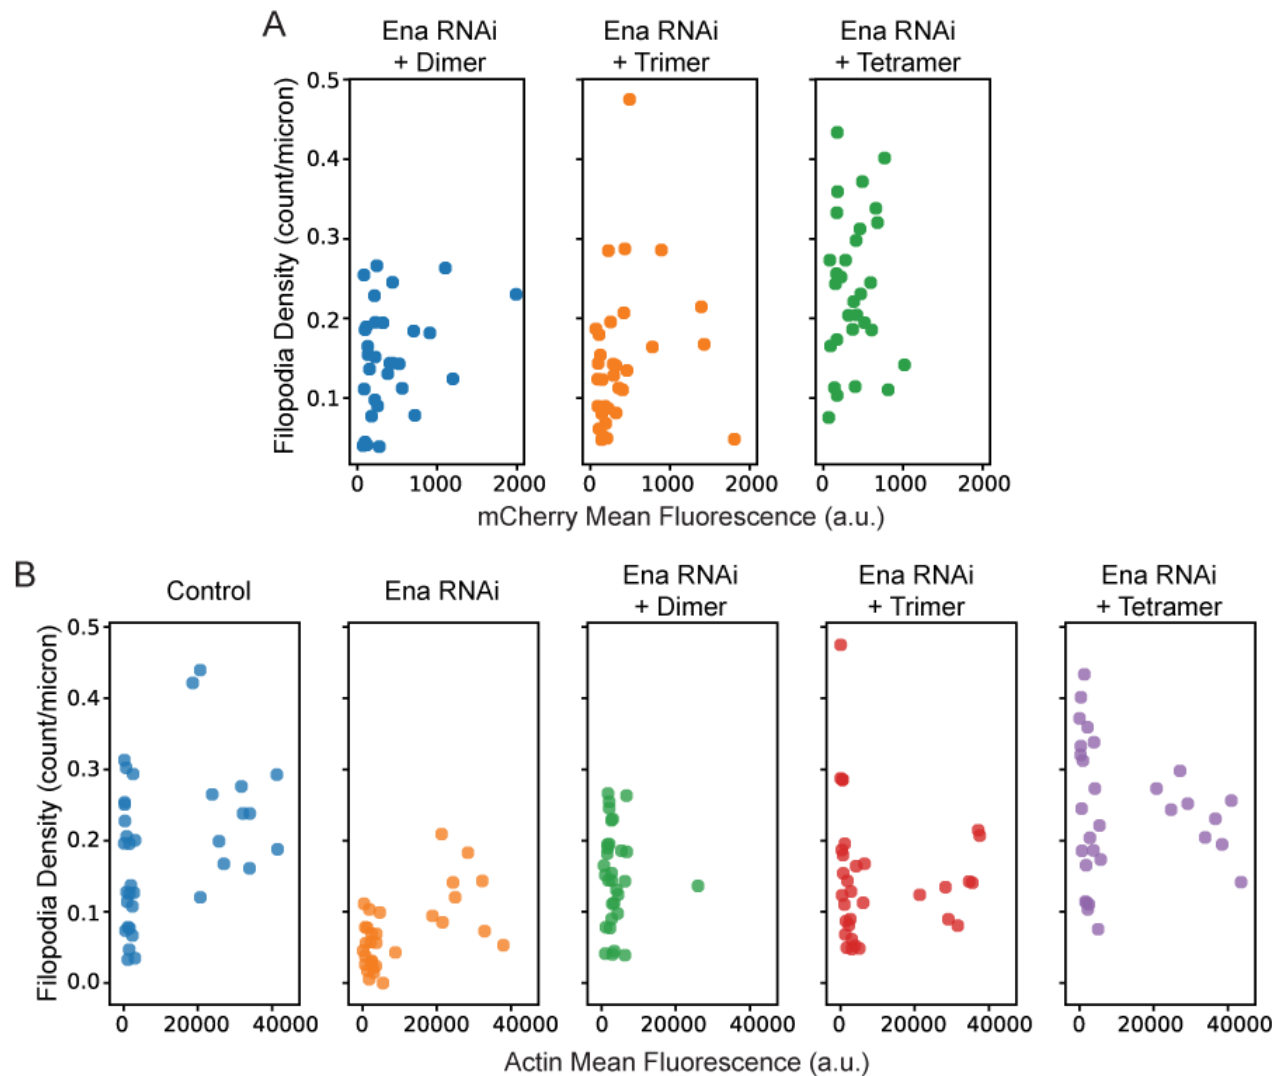

688 **Figure 4 – figure supplement 1. D16 culture cell expression is independent of construct.** (A) Western  
689 blot showing expression levels of transfected mCherry-EnaDimer, mCherry-EnaTrimer, and mCherry-  
690 EnaTetramer. Tubulin showed as loading control. (B) Dependence of filopodia density on GFP-actin  
691 fluorescence of cells. (C) Dependence of filopodia density on the respective mCherry-Ena construct  
692 fluorescence intensity.

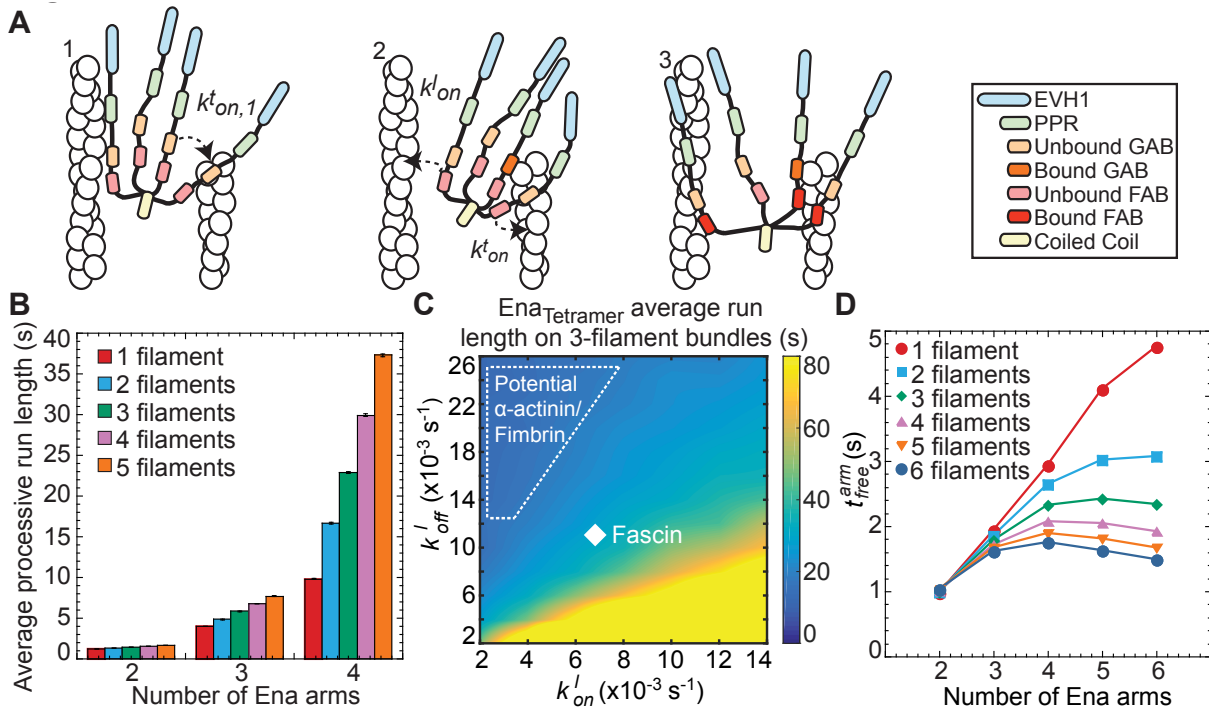

693

694 **Figure 5: Kinetic model of Ena/VASP on actin bundles shows processivity positively correlates with**  
 695 **both number of Ena arms and bundle size.** (A) Modeling schematics showing (from left to right). [1]  
 696 An Ena arm's GAB domain binds the trailing barbed end with binding rate  $k_{on,1}^t$ . [2] Once the GAB domain  
 697 is bound, the FAB domain from the other arms binds to sides of either the trailing filament ( $k_{on}^t$ ) or leading  
 698 filaments ( $k_{on}^l$ ). [3] Arms can be bound to the trailing filament, while others bind leading filaments. (B)  
 699 Bar graph of the average processive run length as a function of number of Ena arms and bundle size. Error  
 700 bars, SEM. (C) Heat map showing average Ena run length in the case of 3-filament bundles and four Ena  
 701 arms, with systematic variations of  $k_{on}^l$  and  $k_{off}^l$ . Diamond denotes optimized rates for fascin bundles and  
 702 region within dotted line shows potential rates for  $\alpha$ -actinin and fimbrin. (D) Average time between  
 703 binding events ( $\tau_{free}^{arm}$ ) for varying arm number and bundle size.

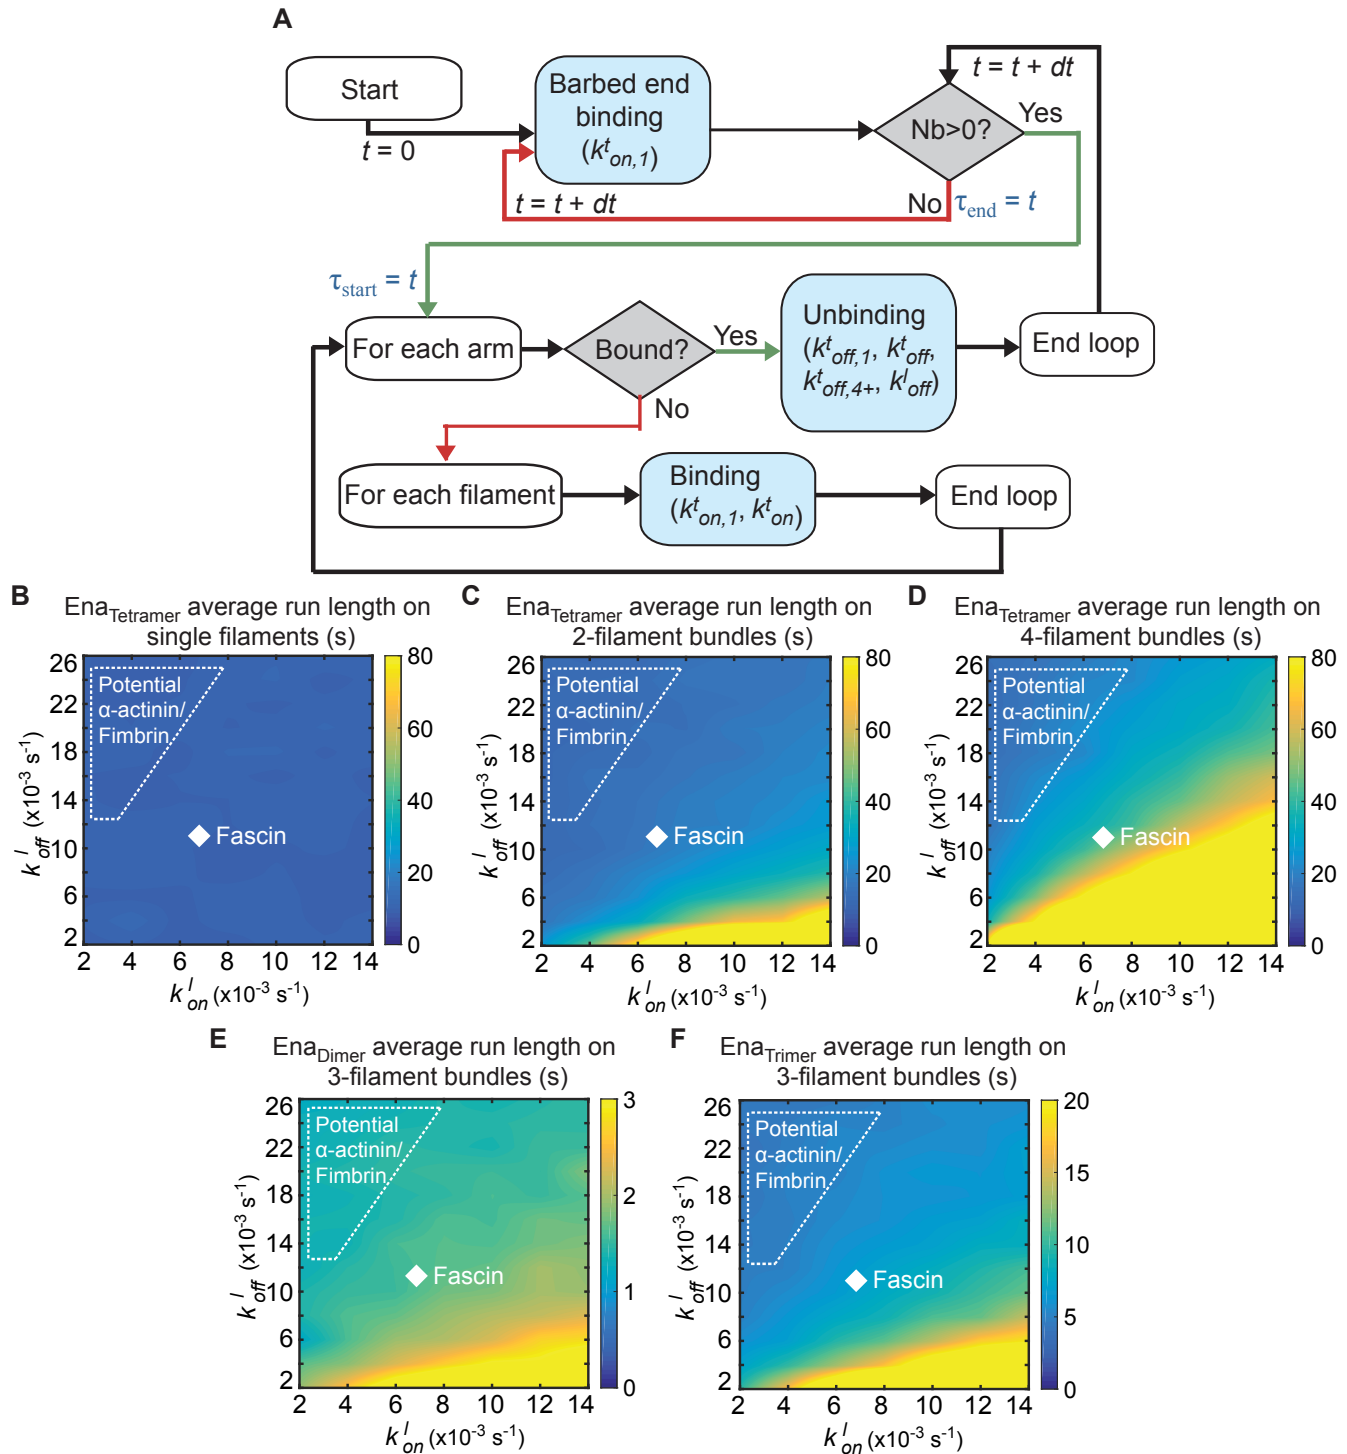

704 **Figure 5 – figure supplement 1. Kinetic model can explore different parameter spaces.** (A) Diagram  
 705 showing the key steps in the algorithm. Nb represents the number of arms bound at time  $t$ .  $\tau_{start}$  and  $\tau_{end}$   
 706 mark the start and end of Ena “molecule” binding events. The processive run length  $\tau$  is estimated as the  
 707 average of the difference  $\tau_{end} - \tau_{start}$  across several events. (B – F) Heat maps showing average Ena  
 708 processive run length with systematic variations of  $k_{on}^l$  and  $k_{off}^l$ . Heat maps of average processive run  
 709 length for (B) single filaments (C) 2-filament bundles or (D) 4-filament bundles with four Ena arms. These  
 710 are comparable to Figure 5C with 3-filament bundles. Heat maps of average processive run length for 3-  
 711 filament bundles with (E) two or (F) three Ena arms.

712

713 **Table 1. Comparison of Ena/VASP proteins' residence time on various bundled F-actin, Related to Results**  
 714 **and Discussion**

| Ena/<br>VASP       | Bundling<br>Protein | Leading <sup>a</sup> (s)     | Trailing <sup>a</sup> (s)     | L/T<br>p-value <sup>b</sup> | 1 fil. <sup>c</sup><br>(s)  | 2 fil. <sup>c</sup><br>(s)    | ≥ 3 fil. <sup>c</sup><br>(s)  | 1/2/≥ 3<br>p-value <sup>d</sup> |
|--------------------|---------------------|------------------------------|-------------------------------|-----------------------------|-----------------------------|-------------------------------|-------------------------------|---------------------------------|
| Ena<br>Tetramer    | Fascin              | 8.4<br>[7.7, 9.1]<br>(254)   | 23.7<br>[22.0, 25.8]<br>(511) | <.0001                      | 8.9<br>[7.5, 10.6]<br>(107) | 16.8<br>[14.3, 19.7]<br>(201) | 26.0<br>[23.7, 28.6]<br>(308) | <.0001                          |
| Ena<br>Tetramer    | Singed              | 10.1<br>[9.4, 11.0]<br>(184) | 28.1<br>[27.0, 29.4]<br>(328) | <.0001                      | 10.0<br>[9.2, 10.8]<br>(98) | 21.7<br>[20.4, 23.3]<br>(155) | 32.3<br>[31.0, 33.6]<br>(176) | <.0001                          |
| Ena<br>Tetramer    | α-actinin           | 10.2<br>[9.5, 11.1]<br>(284) | 9.4<br>[8.4, 10.5]<br>(176)   | 0.64                        | 9.1<br>[8.3, 10.2]<br>(165) | 8.9<br>[7.7, 10.6]<br>(116)   | 8.7<br>[7.8, 9.9]<br>(60)     | 0.56                            |
| Ena<br>Tetramer    | Fimbrin             | 9.0<br>[8.2, 10.0]<br>(127)  | 8.7<br>[7.7, 10.0]<br>(183)   | 0.91                        | 8.2<br>[7.1, 9.8]<br>(63)   | 7.6<br>[6.6, 9.1]<br>(121)    | 10.2<br>[8.6, 12.6]<br>(64)   | 0.33                            |
| VASP<br>Tetramer   | Fascin              | 1.2<br>[0.9, 1.6]<br>(213)   | 3.3<br>[3.1, 3.5]<br>(348)    | <.0001                      | 1.0<br>[0.7, 1.8]<br>(123)  | 2.6<br>[2.4, 2.9]<br>(207)    | 4.2<br>[3.9, 4.4]<br>(143)    | <.0001                          |
| VASP<br>Tetramer   | Singed              | 1.0<br>[0.7, 1.5]<br>(187)   | 3.5<br>[3.2, 3.8]<br>(463)    | <.0001                      | 0.9<br>[0.6, 1.6]<br>(118)  | 2.8<br>[2.6, 3.2]<br>(224)    | 4.1<br>[3.7, 4.7]<br>(220)    | <.0001                          |
| UNC-34<br>Tetramer | Fascin              | 1.7<br>[1.4, 2.2]<br>(82)    | 3.7<br>[3.4, 4.0]<br>(266)    | <.0001                      | 1.2<br>[0.9, 1.8]<br>(65)   | 2.9<br>[2.7, 3.3]<br>(123)    | 3.9<br>[3.5, 4.5]<br>(144)    | <.0001                          |
| Ena Trimer         | Fascin              | 6.2<br>[5.6, 6.9]<br>(322)   | 9.8<br>[9.2, 10.4]<br>(299)   | <.0001                      | 5.3<br>[4.7, 6.1]<br>(151)  | 8.9<br>[8.3, 9.6]<br>(206)    | 11.2<br>[10.2, 12.6]<br>(93)  | <.0001                          |
| Ena Dimer          | Fascin              | 1.3<br>[1.0, 1.7]<br>(376)   | 1.8<br>[1.5, 2.4]<br>(418)    | 0.01                        | 1.2<br>[0.9, 1.9]<br>(197)  | 1.5<br>[1.2, 2.0]<br>(261)    | 2.5<br>[1.9, 3.8]<br>(122)    | 0.03                            |

715 <sup>a</sup> Values of average processive lifetime (s) [95%CI] (n) where n is the number of Ena/VASP binding events  
 716 measured in at least three movies for Leading or Trailing barbed ends.

717 <sup>b</sup> Log Rank p-value comparing Leading and Trailing average processive lifetime.

718 <sup>c</sup> Values of average processive lifetime (s) [95%CI] (n) where n is the number of Ena/VASP binding events  
 719 measured in at least three movies for 1 filament (fil.), 2 filaments, or greater than or equal to 3 filaments barbed  
 720 ends.

721 <sup>d</sup> Log Rank p-value comparing 1 filament, 2 filaments, or greater than or equal to 3 filaments average processive  
 722 lifetime.

723

724  
725

**Table 2: Comparison of actin elongation rates with and without (control) Ena/VASP bound, Related to Results and Discussion**

| Ena/<br>VASP       | Bundling<br>Protein | Bound<br>Leading<br>(sub/s) <sup>a</sup> | Bound<br>Trailing<br>(sub/s) <sup>a</sup> | Control<br>Leading<br>(sub/s) <sup>b</sup> | Control<br>Trailing<br>(sub/s) <sup>b</sup> | Fold<br>Change<br>Leading <sup>c</sup> | Fold<br>Change<br>Trailing <sup>c</sup> | n <sup>d</sup> |
|--------------------|---------------------|------------------------------------------|-------------------------------------------|--------------------------------------------|---------------------------------------------|----------------------------------------|-----------------------------------------|----------------|
| Ena<br>Tetramer    | Fascin              | 25.6<br>± 0.8                            | 16.8<br>± 1.1                             | 10.0<br>± 1.0                              | 7.9<br>± 0.2                                | 2.56<br>± 0.08                         | 2.1<br>± 0.2                            | 2              |
| Ena<br>Tetramer    | Singed              | 22.4<br>± 0.6                            | 20.0<br>± 0.1                             | 10.0<br>± 0.9                              | 10.0<br>± 0.2                               | 2.24<br>± 0.06                         | 2.00<br>± 0.02                          | 2              |
| Ena<br>Tetramer    | $\alpha$ -actinin   | 27.6<br>± 2.7                            | 25.43<br>± 0.03                           | 10.0<br>± 0.2                              | 11.5<br>± 0.5                               | 2.8<br>± 0.3                           | 2.2<br>± 0.1                            | 2              |
| Ena<br>Tetramer    | Fimbrin             | 29.9<br>± 3.7                            | 21.9<br>± 1.0                             | 10.0<br>± 0.1                              | 9.0<br>± 0.3                                | 3.0<br>± 0.4                           | 2.43<br>± 0.04                          | 2              |
| VASP<br>Tetramer   | Fascin              | 23.6<br>± 3.9                            | 18.8<br>± 4.6                             | 10.0<br>± 1.4                              | 8.0<br>± 0.5                                | 2.4<br>± 0.4                           | 2.4<br>± 0.7                            | 2              |
| UNC-34<br>Tetramer | Fascin              | 27.2<br>± 2.3                            | 20.2<br>± 3.4                             | 10.0<br>± 1.8                              | 8.0<br>± 1.5                                | 2.7<br>± 0.2                           | 2.7<br>± 0.9                            | 2              |
| Ena Trimer         | Fascin              | 17.4<br>± 1.3                            | 14.1<br>± 0.8                             | 10.0<br>± 0.2                              | 8.70<br>± 0.05                              | 1.7<br>± 0.1                           | 1.6<br>± 0.1                            | 2              |
| Ena Dimer          | Fascin              | 14.5<br>± 0.2                            | 14.1<br>± 2.2                             | 10.0<br>± 0.2                              | 9.8<br>± 0.9                                | 1.45<br>± 0.02                         | 1.5<br>± 0.4                            | 2              |

726  
727  
728  
729  
730  
731

<sup>a</sup> Normalized actin elongation rate (sub/s) of Ena/VASP bound Leading or Trailing barbed ends to Control Leading.

<sup>b</sup> Normalized actin elongation rate (sub/s) of Ena/VASP free Leading or Trailing barbed ends to Control Leading.

<sup>c</sup> Fold change in actin elongation rate of Ena/VASP bound over Ena/VASP free Leading or Trailing barbed ends.

<sup>d</sup> n is the number of movies analyzed. Each movie had at least five filaments with at least 50 length measurements for each movie.



732 **Table 3: p-values for comparisons of fold change in actin elongation rate with Ena on different bundling**  
733 **proteins for both leading and trailing filaments.**

| <b>Leading/<br/>Trailing<sup>a</sup></b> | <b>Fascin</b> | <b>Singed</b> | <b><math>\alpha</math>-actinin</b> | <b>Fimbrin</b> |
|------------------------------------------|---------------|---------------|------------------------------------|----------------|
| <b>Fascin</b>                            | 1 / 1         | 0.3 / 1       | 0.6 / 0.7                          | 0.4 / 0.3      |
| <b>Singed</b>                            | 0.3 / 1       | 1 / 1         | 0.4 / 0.7                          | 0.3 / 0.3      |
| <b><math>\alpha</math>-actinin</b>       | 0.6 / 0.7     | 0.4 / 0.7     | 1 / 1                              | 0.7 / 0.3      |
| <b>Fimbrin</b>                           | 0.4 / 0.3     | 0.3 / 0.3     | 0.7 / 0.3                          | 1 / 1          |

734 <sup>a</sup> p-values from student's two-tailed t-test with unequal variance between fold change of actin elongation rates  
735 when Ena is bound to the Leading or Trailing barbed end.

736

737  
738

**Table 4: Comparison of Ena/VASP proteins' residence time on parallel and antiparallel bundled F-actin, Related to Results and Discussion**

| Ena/<br>VASP    | Bundling<br>Protein | Parallel <sup>a</sup> (s)     | Anti-parallel <sup>a</sup> (s) | A/P<br>p-value <sup>b</sup> |
|-----------------|---------------------|-------------------------------|--------------------------------|-----------------------------|
| Ena<br>Tetramer | Fascin              | 16.8<br>[14.3, 19.7]<br>(201) | N/A                            | N/A                         |
| Ena<br>Tetramer | Singed              | 21.7<br>[20.4, 23.3]<br>(155) | N/A                            | N/A                         |
| Ena<br>Tetramer | $\alpha$ -actinin   | 9.7<br>[8.1, 12.0]<br>(77)    | 8.8<br>[8.0, 9.8]<br>(90)      | 0.52                        |
| Ena<br>Tetramer | Fimbrin             | 8.9<br>[7.7, 10.4]<br>(64)    | 6.9<br>[5.7, 8.7]<br>(106)     | 0.53                        |

739  
740  
741  
742  
743

<sup>a</sup> Values of average processive lifetime (s) [95%CI] (n) where n is the number of Ena/VASP binding events measured in at least three movies for Parallel or Anti-parallel barbed ends on 2 filament bundles. Fascin results are equal to the values in 2 filaments because fascin only makes parallel bundles.

<sup>b</sup> Log Rank p-value comparing average processive lifetime trailing barbed ends in parallel and antiparallel bundles.

744 **Table 5: p-values for comparisons of fold change in actin elongation rate with different Ena/VASPs on both**  
 745 **leading and trailing filaments of fascin bundles.**

| <b>Leading/<br/>Trailing<sup>a</sup></b> | <b>Ena<sub>Tetramer</sub></b> | <b>VASP</b> | <b>UNC-34</b> | <b>Ena<sub>Trimer</sub></b> | <b>Ena<sub>Dimer</sub></b> |
|------------------------------------------|-------------------------------|-------------|---------------|-----------------------------|----------------------------|
| <b>Ena<sub>Tetramer</sub></b>            | 1 / 1                         | 0.7 / 0.8   | 0.6 / 0.6     | <u>0.05</u> / 0.2           | <u>0.03</u> / 0.3          |
| <b>VASP</b>                              | 0.7 / 0.8                     | 1 / 1       | 0.5 / 0.8     | 0.3 / 0.5                   | 0.3 / 0.4                  |
| <b>UNC-34</b>                            | 0.6 / 0.6                     | 0.5 / 0.8   | 1 / 1         | 0.09 / 0.4                  | 0.1 / 0.4                  |
| <b>Ena<sub>Trimer</sub></b>              | <u>0.05</u> / 0.2             | 0.3 / 0.5   | 0.09 / 0.4    | 1 / 1                       | 0.3 / 0.8                  |
| <b>Ena<sub>Dimer</sub></b>               | <u>0.03</u> / 0.3             | 0.3 / 0.4   | 0.1 / 0.4     | 0.3 / 0.8                   | 1 / 1                      |

746 <sup>a</sup> p-values from student's two-tailed t-test with unequal variance between fold change of actin elongation rates  
 747 when Ena/VASP is bound to the Leading or Trailing barbed end. Underlining shows p-values  $\leq 0.05$ .

748 **Table 6: Final set of rate constants in the kinetic model.**

| $k_{\text{on},1}^t$ | $k_{\text{on}}^t = k_{\text{on},4+}^t = k_{\text{on}}^l$ | $k_{\text{off},1}^t$ | $k_{\text{off}}^t$ | $k_{\text{off},4+}^t$ | $k_{\text{off}}^l$ |
|---------------------|----------------------------------------------------------|----------------------|--------------------|-----------------------|--------------------|
| 0.007               | 0.0122                                                   | 0.1488               | 0.0049             | 0.0055                | 0.0195             |

749

750 **Table 7: Comparison of processive run length ratios defined in Equation (S1) from the model and from**  
751 **TIRFM data.**

| Run length ratios | $\frac{\tau(1,4)}{\tau(1,2)}$ | $\frac{\tau(1,3)}{\tau(1,2)}$ | $\frac{\tau(2,4)}{\tau(1,4)}$ | $\frac{\tau(2,3)}{\tau(1,3)}$ | $\frac{\tau(2,2)}{\tau(1,2)}$ | $\frac{\tau(4,4)}{\tau(1,4)}$ | $\frac{\tau(4,3)}{\tau(1,3)}$ | $\frac{\tau(4,2)}{\tau(1,2)}$ |
|-------------------|-------------------------------|-------------------------------|-------------------------------|-------------------------------|-------------------------------|-------------------------------|-------------------------------|-------------------------------|
| <b>y(model)</b>   | 8.3240                        | 3.3356                        | 1.6951                        | 1.2305                        | 1.0902                        | 2.9064                        | 1.7222                        | 1.2969                        |
| <b>y(TIRFM)</b>   | 7.5727                        | 4.4074                        | 1.8333                        | 1.6875                        | 1.2489                        | 2.8947                        | 2.1236                        | 2.0825                        |

752

## 753 **MOVIE LEGENDS**

754 **Movie 1.** Ena processivity on fascin bundles (corresponds to Figure 1C-D,I,K). Spontaneous assembly of  
755 1.5  $\mu$ M Mg-ATP-actin (15% Oregon green-actin) with 15 pM SNAP(549)-Ena $\Delta$ L (red) and unlabeled 130  
756 nM human fascin visualized by two-color TIRFM. White arrowheads mark free slow-growing barbed  
757 ends, and yellow arrowheads mark fast growing barbed ends associated with Ena. Time interval between  
758 frames is 1 s.

759 **Movie 2.** UNC-34 processivity on fascin bundles (corresponds to Figure 2F-G). Spontaneous assembly of  
760 1.5  $\mu$ M Mg-ATP-actin (15% Oregon green-actin) with 18 pM SNAP(549)-UNC-34 (red) and unlabeled  
761 130 nM human fascin visualized by two-color TIRFM. White arrowheads mark free slow-growing barbed  
762 ends, and yellow arrowheads mark fast growing barbed ends associated with UNC-34. Time interval  
763 between frames is 0.5 s.

764 **Movie 3.** Ena<sub>Dimer</sub> processivity on fascin bundles (corresponds to Figure 3C,E). Spontaneous assembly of  
765 1.5  $\mu$ M Mg-ATP-actin (15% Alexa488-actin) with 50 pM MBP-SNAP(549)-Ena $\Delta$ LACC-GCN4 (red) and  
766 unlabeled 130 nM human fascin visualized by two-color TIRFM. White arrowheads mark free slow-  
767 growing barbed ends, and yellow arrowheads mark fast growing barbed ends associated with Ena<sub>Dimer</sub>.  
768 Time interval between frames is 0.5 s.

769

## 770 **ACKNOWLEDGEMENTS**

771 We thank Elena Solomaha of the University of Chicago BioPhysics Core Facility for performing SEC-  
772 MALS and Jonathan Winkelman for cloning VASP and UNC-34. We thank Caitlin Anderson, Katie  
773 Homa, Cristian Suarez and other members of the D.R.K. laboratory for helpful discussions. We thank the  
774 *Drosophila* Genomics Resource Center, supported by NIH grant 2P40OD010949, for *Drosophila* cells.  
775 This material is based upon work supported by the National Science Foundation Graduate Research  
776 Fellowship under Grant No. DGE-1144082 and DGE-1746045 (to A.J.H.), National Institute for Health's  
777 Molecular and Cellular Biology Training Grant T32 GM007183 (to A.J.H.), National Institute for Health's  
778 Grant RO1 GM079265 (to D.R.K.), Department of Defense Army Research Office's MURI grant  
779 W911NF1410403 (to G.A.V. and D.R.K.), and by the University of Chicago Materials Research Science  
780 and Engineering Center, funded by National Science Foundation award DMR-1420709 (to G.A.V. and



781 D.R.K.). Acknowledgement is made to the computational resources provided by the Research Computing  
782 Center at The University of Chicago.

783

## 784 REFERENCES

- 785 Applewhite DA, Barzik M, Kojima S-I, Svitkina TM, Gertler FB, Borisyy GG. 2007. Ena/VASP proteins  
786 have an anti-capping independent function in filopodia formation. *Mol Biol Cell* 18:2579–2591.  
787 doi:10.1091/mbc.E06-11-0990
- 788 Bachmann C, Fischer L, Walter U, Reinhard M. 1999. The EVH2 Domain of the Vasodilator-stimulated  
789 Phosphoprotein Mediates Tetramerization, F-actin Binding, and Actin Bundle Formation. *J Biol*  
790 *Chem* 274:23549–23557. doi:10.1074/jbc.274.33.23549
- 791 Ball LJ, Jarchau Thomas, Oschkinat Hartmut, Walter Ulrich. 2001. EVH1 domains: structure, function  
792 and interactions. *FEBS Letters* 513:45–52. doi:10.1016/S0014-5793(01)03291-4
- 793 Barzik M, Kotova TI, Higgs HN, Hazelwood L, Hanein D, Gertler FB, Schafer DA. 2005. Ena/VASP  
794 proteins enhance actin polymerization in the presence of barbed end capping proteins. *J Biol*  
795 *Chem* 280:28653–28662. doi:10.1074/jbc.M503957200
- 796 Bear JE, Gertler FB. 2009. Ena/VASP: towards resolving a pointed controversy at the barbed end. *J Cell*  
797 *Sci* 122:1947–1953. doi:10.1242/jcs.038125
- 798 Bear JE, Svitkina TM, Krause M, Schafer DA, Loureiro JJ, Strasser GA, Maly IV, Chaga OY, Cooper  
799 JA, Borisyy GG, Gertler FB. 2002. Antagonism between Ena/VASP proteins and actin filament  
800 capping regulates fibroblast motility. *Cell* 109:509–521.
- 801 Bilancia CG, Winkelman JD, Tsygankov D, Nowotarski SH, Sees JA, Comber K, Evans I, Lakhani V,  
802 Wood W, Elston TC, Kovar DR, Peifer M. 2014. Enabled Negatively Regulates Diaphanous-  
803 Driven Actin Dynamics In Vitro and In Vivo. *Developmental Cell* 28:394–408.  
804 doi:10.1016/j.devcel.2014.01.015
- 805 Breitsprecher D, Kiesewetter AK, Linkner J, Urbanke C, Resch GP, Small JV, Faix J. 2008. Clustering  
806 of VASP actively drives processive, WH2 domain-mediated actin filament elongation. *The*  
807 *EMBO Journal* 27:2943–2954. doi:10.1038/emboj.2008.211
- 808 Breitsprecher D, Kiesewetter AK, Linkner J, Vinzenz M, Stradal TEB, Small JV, Curth U, Dickinson  
809 RB, Faix J. 2011. Molecular mechanism of Ena/VASP-mediated actin-filament elongation. *The*  
810 *EMBO Journal* 30:456–467. doi:10.1038/emboj.2010.348
- 811 Brindle NP, Holt MR, Davies JE, Price CJ, Critchley DR. 1996. The focal-adhesion vasodilator-  
812 stimulated phosphoprotein (VASP) binds to the proline-rich domain in vinculin. *Biochem J* 318 (  
813 Pt 3):753–757.
- 814 Brühmann S, Ushakov DS, Winterhoff M, Dickinson RB, Curth U, Faix J. 2017. Distinct VASP  
815 tetramers synergize in the processive elongation of individual actin filaments from clustered  
816 arrays. *PNAS* 114:E5815–E5824. doi:10.1073/pnas.1703145114
- 817 Campellone KG, Welch MD. 2010. A Nucleator Arms Race: Cellular Control of Actin Assembly. *Nat*  
818 *Rev Mol Cell Biol* 11:237–251. doi:10.1038/nrm2867
- 819 Cant K, Knowles BA, Mooseker MS, Cooley L. 1994. Drosophila singed, a fascin homolog, is required  
820 for actin bundle formation during oogenesis and bristle extension. *J Cell Biol* 125:369–380.
- 821 Chereau D, Dominguez R. 2006. Understanding the role of the G-actin-binding domain of Ena/VASP in  
822 actin assembly. *Journal of Structural Biology, Fibrous Protein Structure* 155:195–201.  
823 doi:10.1016/j.jsb.2006.01.012

- 824 Currie JD, Rogers SL. 2011. Using the *Drosophila melanogaster* D17-c3 cell culture system to study cell  
825 motility. *Nat Protoc* 6:1632–1641. doi:10.1038/nprot.2011.397
- 826 Dominguez R, Holmes KC. 2011. Actin Structure and Function. *Annu Rev Biophys* 40:169–186.  
827 doi:10.1146/annurev-biophys-042910-155359
- 828 Edwards RA, Bryan J. 1995. Fascins, a family of actin bundling proteins. *Cell Motil Cytoskeleton* 32:1–  
829 9. doi:10.1002/cm.970320102
- 830 Faix J, Rottner K. 2006. The making of filopodia. *Current Opinion in Cell Biology*, Cell structure and  
831 dynamics 18:18–25. doi:10.1016/j.ceb.2005.11.002
- 832 Ferron F, Rebowski G, Lee SH, Dominguez R. 2007. Structural basis for the recruitment of profilin-  
833 actin complexes during filament elongation by Ena/VASP. *EMBO J* 26:4597–4606.  
834 doi:10.1038/sj.emboj.7601874
- 835 Fleming T, Chien S-C, Vanderzalm PJ, Dell M, Gavin MK, Forrester WC, Garriga G. 2010. The role of  
836 *C. elegans* Ena/VASP homolog UNC-34 in neuronal polarity and motility. *Dev Biol* 344:94–106.  
837 doi:10.1016/j.ydbio.2010.04.025
- 838 Gupton SL, Gertler FB. 2007. Filopodia: the fingers that do the walking. *Sci STKE* 2007:re5.  
839 doi:10.1126/stke.4002007re5
- 840 Güthe S, Kapinos L, Möglich A, Meier S, Grzesiek S, Kiefhaber T. 2004. Very Fast Folding and  
841 Association of a Trimerization Domain from Bacteriophage T4 Fibritin. *Journal of Molecular*  
842 *Biology* 337:905–915. doi:10.1016/j.jmb.2004.02.020
- 843 Hanein D, Volkman N, Goldsmith S, Michon A-M, Lehman W, Craig R, DeRosier D, Almo S,  
844 Matsudaira P. 1998. An atomic model of fimbrin binding to F-actin and its implications for  
845 filament crosslinking and regulation. *Nat Struct Mol Biol* 5:787–792. doi:10.1038/1828
- 846 Hansen SD, Mullins RD. 2010. VASP is a processive actin polymerase that requires monomeric actin  
847 for barbed end association. *J Cell Biol* 191:571–584. doi:10.1083/jcb.201003014
- 848 Harbury PB, Zhang T, Kim PS, Alber T. 1993. A switch between two-, three-, and four-stranded coiled  
849 coils in GCN4 leucine zipper mutants. *Science* 262:1401–1407. doi:10.1126/science.8248779
- 850 Havrylenko S, Noguera P, Abou-Ghali M, Manzi J, Faqir F, Lamora A, Guérin C, Blanchoin L, Plastino  
851 J. 2015. WAVE binds Ena/VASP for enhanced Arp2/3 complex-based actin assembly. *Mol Biol*  
852 *Cell* 26:55–65. doi:10.1091/mbc.E14-07-1200
- 853 Jansen S, Collins A, Yang C, Rebowski G, Svitkina T, Dominguez R. 2011. Mechanism of Actin  
854 Filament Bundling by Fascin. *J Biol Chem* 286:30087–30096. doi:10.1074/jbc.M111.251439
- 855 Kaplan EL, Meier P. 1958. Nonparametric Estimation from Incomplete Observations. *Journal of the*  
856 *American Statistical Association* 53:457–481. doi:10.2307/2281868
- 857 Kuhn JR, Pollard TD. 2005. Real-time measurements of actin filament polymerization by total internal  
858 reflection fluorescence microscopy. *Biophys J* 88:1387–1402. doi:10.1529/biophysj.104.047399
- 859 Kuhnel K, Jarchau T, Wolf E, Schlichting I, Walter U, Wittinghofer A, Strelkov SV. 2004. The VASP  
860 tetramerization domain is a right-handed coiled coil based on a 15-residue repeat. *Proc Natl*  
861 *Acad Sci U S A* 101:17027–17032. doi:10.1073/pnas.0403069101
- 862 Li Y, Christensen JR, Homa KE, Hocky GM, Fok A, Sees JA, Voth GA, Kovar DR. 2016. The F-actin  
863 bundler  $\alpha$ -actinin Ain1 is tailored for ring assembly and constriction during cytokinesis in fission  
864 yeast. *Mol Biol Cell* 27:1821–1833. doi:10.1091/mbc.E16-01-0010
- 865 Mattila PK, Lappalainen P. 2008. Filopodia: molecular architecture and cellular functions. *Nat Rev Mol*  
866 *Cell Biol* 9:446–454. doi:10.1038/nrm2406
- 867 Meijering E, Dzyubachyk O, Smal I. 2012. Chapter nine - Methods for Cell and Particle Tracking In:  
868 conn PM, editor. *Methods in Enzymology, Imaging and Spectroscopic Analysis of Living Cells*.  
869 Academic Press. pp. 183–200. doi:10.1016/B978-0-12-391857-4.00009-4

- 870 Neidt EM, Skau CT, Kovar DR. 2008. The cytokinesis formins from the nematode worm and fission  
871 yeast differentially mediate actin filament assembly. *J Biol Chem* 283:23872–23883.  
872 doi:10.1074/jbc.M803734200
- 873 Papanikolopoulou K, Forge V, Goeltz P, Mitraki A. 2004. Formation of Highly Stable Chimeric Trimers  
874 by Fusion of an Adenovirus Fiber Shaft Fragment with the Foldon Domain of Bacteriophage T4  
875 Fibrin. *J Biol Chem* 279:8991–8998. doi:10.1074/jbc.M311791200
- 876 Pasic L, Kotova T, Schafer DA. 2008. Ena/VASP proteins capture actin filament barbed ends. *J Biol*  
877 *Chem* 283:9814–9819. doi:10.1074/jbc.M710475200
- 878 Pollard TD, Borisy GG. 2003. Cellular motility driven by assembly and disassembly of actin filaments.  
879 *Cell* 112:453–465.
- 880 Pollard TD, Cooper JA. 2009. Actin, a central player in cell shape and movement. *Science* 326:1208–  
881 1212. doi:10.1126/science.1175862
- 882 Reinhard M, Halbrugge M, Scheer U, Wiegand C, Jockusch BM, Walter U. 1992. The 46/50 kDa  
883 phosphoprotein VASP purified from human platelets is a novel protein associated with actin  
884 filaments and focal contacts. *EMBO J* 11:2063–2070.
- 885 Schneider CA, Rasband WS, Eliceiri KW. 2012. NIH Image to ImageJ: 25 years of image analysis.  
886 *Nature Methods*. doi:10.1038/nmeth.2089
- 887 Sebé-Pedrós A, Burkhardt P, Sánchez-Pons N, Fairclough SR, Lang BF, King N, Ruiz-Trillo I. 2013.  
888 Insights into the Origin of Metazoan Filopodia and Microvilli. *Mol Biol Evol* 30:2013–2023.  
889 doi:10.1093/molbev/mst110
- 890 Sheffield M, Loveless T, Hardin J, Pettitt J. 2007. *C. elegans* Enabled exhibits novel interactions with N-  
891 WASP, Abl, and cell-cell junctions. *Curr Biol* 17:1791–1796. doi:10.1016/j.cub.2007.09.033
- 892 Sjöblom B, Salmazo A, Djinović-Carugo K. 2008. Alpha-actinin structure and regulation. *Cell Mol Life*  
893 *Sci* 65:2688–2701. doi:10.1007/s00018-008-8080-8
- 894 Skau CT, Kovar DR. 2010. Fimbrin and tropomyosin competition regulates endocytosis and cytokinesis  
895 kinetics in fission yeast. *Curr Biol* 20:1415–1422. doi:10.1016/j.cub.2010.06.020
- 896 Spudich JA, Watt S. 1971. The regulation of rabbit skeletal muscle contraction. I. Biochemical studies  
897 of the interaction of the tropomyosin-troponin complex with actin and the proteolytic fragments  
898 of myosin. *J Biol Chem* 246:4866–4871.
- 899 Svitkina TM, Bulanova EA, Chaga OY, Vignjevic DM, Kojima S, Vasiliev JM, Borisy GG. 2003.  
900 Mechanism of filopodia initiation by reorganization of a dendritic network. *J Cell Biol* 160:409–  
901 421. doi:10.1083/jcb.200210174
- 902 Tsygankov D, Bilancia CG, Vitriol EA, Hahn KM, Peifer M, Elston TC. 2014. CellGeo: A  
903 computational platform for the analysis of shape changes in cells with complex geometries. *J*  
904 *Cell Biol* 204:443–460. doi:10.1083/jcb.201306067
- 905 Untergasser A, Cutcutache I, Koressaar T, Ye J, Faircloth BC, Remm M, Rozen SG. 2012. Primer3—  
906 new capabilities and interfaces. *Nucleic Acids Res* 40:e115. doi:10.1093/nar/gks596
- 907 Vignjevic D, Kojima S, Aratyn Y, Danciu O, Svitkina T, Borisy GG. 2006. Role of fascin in filopodial  
908 protrusion. *J Cell Biol* 174:863–875. doi:10.1083/jcb.200603013
- 909 Vignjevic D, Yarar D, Welch MD, Peloquin J, Svitkina T, Borisy GG. 2003. Formation of filopodia-like  
910 bundles in vitro from a dendritic network. *J Cell Biol* 160:951–962. doi:10.1083/jcb.200208059
- 911 Winkelman JD, Bilancia CG, Peifer M, Kovar DR. 2014. Ena/VASP Enabled is a highly processive  
912 actin polymerase tailored to self-assemble parallel-bundled F-actin networks with Fascin. *PNAS*  
913 111:4121–4126. doi:10.1073/pnas.1322093111
- 914 Winkelman JD, Suarez C, Hocky GM, Harker AJ, Morgenthaler AN, Christensen JR, Voth GA, Bartles  
915 JR, Kovar DR. 2016. Fascin- and  $\alpha$ -Actinin-Bundled Networks Contain Intrinsic Structural

- 916 Features that Drive Protein Sorting. *Current Biology* 26:2697–2706.  
917 doi:10.1016/j.cub.2016.07.080
- 918 Yamakita Y, Ono S, Matsumura F, Yamashiro S. 1996. Phosphorylation of Human Fascin Inhibits Its  
919 Actin Binding and Bundling Activities. *J Biol Chem* 271:12632–12638.  
920 doi:10.1074/jbc.271.21.12632
- 921 Yang S, Huang F-K, Huang J, Chen S, Jakoncic J, Leo-Macias A, Diaz-Avalos R, Chen L, Zhang JJ,  
922 Huang X-Y. 2013. Molecular mechanism of fascin function in filopodial formation. *J Biol Chem*  
923 288:274–284. doi:10.1074/jbc.M112.427971
- 924 Zimmermann D, Morganthaler AN, Kovar DR, Suarez C. 2016. In Vitro Biochemical Characterization  
925 of Cytokinesis Actin-Binding Proteins Yeast Cytokinesis, *Methods in Molecular Biology*.  
926 Humana Press, New York, NY. pp. 151–179. doi:10.1007/978-1-4939-3145-3\_12  
927
